1     **Selection for imperfection: A review of asymmetric genitalia**  
2             **in araneomorph spiders (Araneae: Araneomorphae).**

3  
4  
5  
6     **F. ANDRES RIVERA-QUIROZ<sup>\*1,3</sup>, MENNO SCHILTHUIZEN<sup>2,3</sup>, BOOPA**  
7     **PETCHARAD<sup>4</sup> and JEREMY A. MILLER<sup>1</sup>**

8     <sup>1</sup> Department Biodiversity Discovery group, Naturalis Biodiversity Center,  
9     Darwinweg 2, 2333CR Leiden, The Netherlands

10    <sup>2</sup> Endless Forms Group, Naturalis Biodiversity Center, Darwinweg 2, 2333CR Leiden,  
11    The Netherlands

12    <sup>3</sup> Institute for Biology Leiden (IBL), Leiden University, Sylviusweg 72, 2333BE  
13    Leiden, The Netherlands.

14    <sup>4</sup> Faculty of Science and Technology, Thammasat University, Rangsit, Pathum Thani,  
15    12121 Thailand.

16  
17  
18  
19    **Running Title:** Asymmetric genitalia in spiders

20  
21    \*Corresponding author

22    E-mail: andres.riveraquiros@naturalis.nl (AR)

23

## 24 **Abstract**

25

26 Bilateral asymmetry in the genitalia is a rare but widely dispersed phenomenon in the  
27 animal tree of life. In arthropods, occurrences vary greatly from one group to another  
28 and there seems to be no common explanation for all the independent origins. In  
29 spiders, genital asymmetry appears to be especially rare. Few examples have been  
30 studied in detail but isolated reports are scattered in the taxonomic literature. Based on a  
31 broad literature study, we found several species in thirteen families with evidence of  
32 genital asymmetry, mostly expressed only in females. Our review suggests that spider  
33 genital asymmetries, although rare, are more common than previously thought and  
34 taxonomic descriptions and illustrations are a useful but not entirely reliable tool for  
35 studying them. Here we also document thoroughly the case of the liocranid spider  
36 *Teutamus politus*. We collected live specimens to observe male-female interactions and  
37 document their genital morphology. We consider *T. politus* to be the first known case of  
38 directional asymmetry and the first report of developmentally asymmetric male genitalia  
39 in Entelegynae spiders. Generalities, evolution and categorization of asymmetry in  
40 spiders are further discussed.

41

42 **Keywords:**

43 Chirality, sexual selection, antisymmetry, Araneae, Synspermiata, Entelegynae, RTA,  
44 Liocranidae.

45

46

47

48

## 49 **Introduction**

50 Genital asymmetry is a trait that has evolved independently several times in many  
51 animal groups. Invertebrates show a wide range of genital asymmetries with probably  
52 thousands of independent origins. Many, sometimes not mutually exclusive,  
53 explanations have been proposed, namely: i) morphological compensation for selected  
54 changes in mating position; ii) sexually antagonistic co-evolution; iii) cryptic female  
55 choice for asymmetric male genitalia; iv) different functions for the left and right side;  
56 v) one-sided reduction to save space and resources; vi) functional constraints: to  
57 function properly, the separate parts of the genitalia need to connect in an asymmetric  
58 fashion; vii) efficient packing of internal organs in the body cavity [1–4].

59

60 Asymmetries are often classified as fluctuating (FA), antisymmetry (AS) or directional  
61 (DA) [3,5,6]. This categorization is based on the degree and relative frequencies of the  
62 different chiral forms found in a population. FA describes slight asymmetric variation  
63 around a symmetrical mean; the appearance of this type of asymmetry is usually related  
64 to environmental or developmental constraints [5,7]. AS describes cases where two  
65 mirror image forms, dextral and sinistral, are identifiable and within a population,  
66 occurring usually in equal or similar proportions [3]. Finally, DA refers to cases where  
67 only one asymmetric form is virtually always present [3]; this might be associated with  
68 mechanical, behavioral, or functional differentiation and selection of one asymmetrical  
69 form of the structures or organs [3,8].

70

71 Genital asymmetry, although rare as a whole, is a recurring phenomenon in a few  
72 groups of arthropods like mites, crustaceans, opiliones, and very common several insect  
73 orders. However, in spiders (Fig. 1a), sexual asymmetries seem to be rather an

74 uncommon exception [1–4,9,10]. In insects, copulatory mechanics and the presence of a  
75 single male genital structure located at the posterior end of the abdomen might explain  
76 the great incidence of genital asymmetry in this group [1,3,11]. In contrast, spiders have  
77 two male copulatory organs derived from a modified pair of leg-like appendages (Fig.  
78 1b). These are normally both used sequentially for sperm transfer during copulation  
79 [12]. The presence of these paired structures has been hypothesized to act as an  
80 “evolutionary buffer” to the development of genital asymmetry, especially on male  
81 genitals [1,3,10].

82

83 **Figure 1.- Spider relations and spider genitalia.** a) Schematic tree based on a  
84 comprehensive spider phylogeny by Wheeler et al. [13]. Number of families per  
85 clade are indicated between parentheses; approximate percentage of species per  
86 clade relative to the Order Araneae is also given. Family name tags indicate the  
87 ones with known asymmetric species. b) Ventral view of spider copulatory organs:  
88 ♀ Epigynum (E) and ♂ Pedipalp bulb (P); modified from Foelix [12].

89

90 Most cases of asymmetry in spiders have not been studied in detail or even discussed,  
91 with the notable exception of pholcids and theridiids [1,3]. Nevertheless, taxonomic  
92 illustrations and descriptions give evidence of the existence of this phenomenon in other  
93 families. Genital asymmetry has been documented in females, males or both sexes, with  
94 seemingly several independent origins in the spider tree of life. All known cases have  
95 been reported in two major clades: Synspermiata and Entelegynae that include about  
96 13% and 80% of known spider diversity, respectively (Fig. 1a); within the Entelegynae,  
97 asymmetries have been documented in the clades Araneoidea and RTA.  
98 Morphologically, Synspermiata spiders tend to have structurally simpler genitalia than  
99 entelegyne spiders in both sexes. Asymmetries in Synspermiata have been properly  
100 documented in two families: Pholcidae (Fig. 2 a, h) and Oonopidae (Fig. 2 , h); but  
101 taxonomic descriptions of some Ochyroceratidae (Fig. 2 b, d), Telemidae (Fig. 2 f) and

102 Sicariidae depict female genital asymmetry too. In Entelegynae, examples appear more  
103 scattered with most cases being found in the family Theridiidae (Fig. 3a-c) and some  
104 more documented in at least six families of the RTA clade (Fig. 3b, d-h). Explanations  
105 for genital asymmetry in spiders are diverse and could include individual variation,  
106 natural selection, or sexual selection [1,3,10,14,15].

107

108

109 **Figure 2.- Examples of genital asymmetry in Synspermiata.** a, e) male pedipalps,  
110 lateral view. b-d, f-h) vulva, dorsal view. a) Pholcidae: *Metagonia mariquitarensis*;  
111 modified from Huber [8]. b) Ochyroceratidae: *Althepus naphongensis*; modified  
112 from Li *et al.* [16]. c) Sicariidae: *Hexophthalma albospinosa*; modified from  
113 Magalhaes and Brescovit [17]. d) Ochyroceratidae: *Speocera cattien*; modified  
114 from Tong, *et al.* [18]. e) Oonopidae: *Paradysderina righty*; modified from Platnick  
115 and Dupérré [19]. f) Telemididae: *Telema exiloculata*; modified from Lin and Li  
116 [20]. g) Oonopidae: *Triaeris stenaspis*. h) Pholcidae: *Metagonia delicate*; modified  
117 from Huber [21].

118

119 **Figure 3.- Examples of genital asymmetry in Entelegynae.** a, b, d-h) vulva, dorsal  
120 view. c) male and female during copulation. a) Theridiidae: *Asygyna*  
121 *coddingtoni*; modified from Agnarsson [22]. b) Phrurolithidae: *Scotinella*  
122 *fratella*;; modified from Dondale and Redner [23]. c) Theridiidae: *Tidarren*  
123 *sisyphoides*. Arrow shows the presence of only one pedipalp; modified from  
124 Knoflach [24]. d) Gnaphosidae: *Apopyllus gandarella*; modified from Azevedo  
125 *et al.* [25]. e) Hahnidae: *Neoantistea agilis*; modified from Opell and Beatty  
126 [26]. f) Trachelidae: *Trachelas ductonuda*; modified from Rivera-Quiroz and  
127 Alvarez-Padilla [27]. g) Liocranidae: *Jacaena mihun*. h) Cithaeronidae:  
128 *Cithaeron praedonius*;; modified from Ruiz and Bonaldo [28].  
129

130 Spider genital asymmetry can be classified as follows: Fluctuating asymmetry (FA) is  
131 probably the most common type and has been properly documented in some Lycosidae  
132 [29–32], Pholcidae [33], and Oxyopidae [10,34]. Other examples of seemingly  
133 asymmetric structures like the pedipalps of the one known specimen of *Pimoa petita*  
134 [35] or the numerous documented anomalies and deformities [36–39] might easily be  
135 explained by developmental malformations (Fig. 4).

136

137 **Figure 4.- Examples of genital malformation in spiders.** a,c) male pedipalps,  
138 posterior-lateral view. b) vulva, ventral view. a) *Lycosa ammophila*; modified  
139 from Kaston [37]. b) *Pardosa sagei*; modified from Kaston [37]. c) *Pimoa*  
140 *petita*; modified from Hormiga [35].  
141

142

143 Antisymmetry (AS) is the second most common form of asymmetry in spiders and has  
144 been documented in three genera of the Theridiidae (*Asygyna*, *Echinotheridion*, and  
145 *Tidarren*) (Fig. 3a, c) [22,40,41]; one genus of Pholcidae (*Metagonia*) (Fig. 2a, h) [21];  
146 one genus of Phrurolithidae (*Scotinella*) (Fig. 3b) [42] and scattered cases such as in  
147 Trachelidae (Fig. 3f) [27,43,44], Cithaeronidae (Fig. 3h) [45] and other RTA families.

148 Directional asymmetry (DA) is the rarest type and, until now, it had only been reported  
149 in the pholcid *Metagonia mariguitarensis* (Fig 2h) [8]; DA has also been implied some  
150 descriptions within the Oonopidae (Fig 2e) [19,46], and in the liocranid *Teutamus*  
151 *politus* female genitalia [47]. All of these, other isolated reports, and scattered  
152 descriptions and illustrations suggest that genital asymmetries in spiders have originated  
153 independently several times and their study might give better insights into how and  
154 when this phenomenon has evolved and the selective mechanisms behind it.

155

156 A particularly interesting example are the Liocranidae where two different types of  
157 asymmetry are present [47–49]. For example, *Jacaena mihun* (Fig. 3g) shows no  
158 external chirality, but internally the asymmetric copulation ducts are highly variable  
159 among individuals. Another example, *Teutamus politus* (Figs 5-7), shows external  
160 asymmetry in the female genitalia with both copulatory openings fused together in one  
161 atrium placed on the left side of the epigyne (see Deeleman-Reinhold [47]: fig 800,  
162 801). Deeleman-Reinhold [47] mentioned female asymmetry as a diagnostic character  
163 for this species and noted that in all six of the specimens available for examination, the

164 atrium is located in the left side. A revision of the genus *Teutamus* [48] also included  
165 asymmetry in the female genitalia as a diagnostic character for *T. politus*, and expanded  
166 the sample of specimens examined; asymmetry in male pedipalp was not reported in  
167 either of these cases.

168

169 Here we present a general review of genital asymmetries in spider literature, grouping  
170 them in previously described categories of genital asymmetry and discussing the  
171 existence of a new category of female genital asymmetry (here called Chaotic  
172 Asymmetry). We also analyzed the specific case of the species *Teutamus politus* by  
173 collecting new specimens in Thailand and documenting male and female genitalia using  
174 diverse morphological methods. This gives evidence of the first cases of both  
175 directional asymmetry in males and females, and developmental male genital  
176 asymmetry in Entelegynae spiders.

177

## 178 **Material and Methods**

179 **Literature review-** We performed an informal search in taxonomic literature of several  
180 Synspermiata and Entelegyne families. Selection of publications was initially based on  
181 reported cases in literature [1,3,8,10,11] and then expanded depending on the  
182 occurrences found within each family. We did not contemplate individual cases of clear  
183 FA but this type of asymmetry is included in our discussion. We considered *T. politus*  
184 as a good model for testing basic hypotheses on genital asymmetry because of the clear  
185 external and internal morphology of female genitalia and Deeleman-Reinhold's [47]  
186 note suggesting this could be a case of DA. Furthermore, we hypothesized that  
187 morphological or behavioral compensation for female genital asymmetry could be  
188 found in the male.

189

190 We considered male asymmetry as those cases that result in clear morphological  
191 differences between right and left pedipalp regardless of having a developmental or  
192 behavioral origin. Based on this, we also considered the pedipalp amputation that males  
193 of *Echinoitheridion* and *Tidarren* perform on themselves in our review; especially since  
194 the asymmetry has clear adaptive and evolutionary implications [14,41,50–52].

195

196

197 **Fieldwork-** We selected study sites and collecting dates based on the relative numbers  
198 of collected adult specimens of *T. politus* mentioned in literature [47,48]. Fieldwork was  
199 carried out in Thailand between July 29<sup>th</sup> and August 12<sup>th</sup> 2018; here we sampled 12  
200 sites in total: eight in Phuket Island and four more in Krabi Province. We attempted to  
201 cover a variety of vegetation types ranging from relatively well preserved mixed forests  
202 to rubber and oil palm plantations. In each site we processed leaf litter using Winkler  
203 extractors and direct collecting on ground, among leaf litter and under rocks and logs.  
204 Hand collected specimens were kept alive in individual tubes. Winkler specimens were  
205 collected in a mixture of propylene glycol and 96% ethanol. All the specimens have  
206 been deposited in the collection of the Naturalis Biodiversity Center, Leiden, The  
207 Netherlands.

208

209 **Behavioral observations-** Live specimens were kept individually in clean 15ml Falcon  
210 tubes and fed with termites every two days. Seventeen males and 19 females were  
211 selected and assigned unique numbers. Couples were formed preferably with specimens  
212 from the same locality. Spiders were placed in a Petri dish (diameter 5 cm, height 1  
213 cm); each dish was divided by a paper wall with a small opening so spiders could roam



214 freely but flee in case of aggression. Each couple was kept in the dish under constant  
215 observation for a period of about three hours. After observations, all specimens were  
216 sacrificed and stored in 96% ethanol.

217

218 **Morphological methods-** Somatic characters and male sexual structures were  
219 photographed using a Leica MI6SC Stereomicroscope equipped with a Nikon DS-Ri2  
220 camera. Female genitalia were dissected, digested using a pancreatine solution [53],  
221 cleared with methyl salicylate. Observations were made using semi-permanent slide  
222 preparations [54] in a Leica DM 2500 microscope with the same camera as above. Male  
223 genitals were expanded using 10% KOH and distilled water in three 3 min. cycles  
224 leaving the pedipalps in distilled water overnight to stabilize them for photography.  
225 Female epigyna and male pedipalps were prepared for SEM and mounted following  
226 Alvarez-Padilla and Hormiga [53] SEM images were obtained using a JEOL JSM-  
227 6480LV electron microscope.

228

229 The following abbreviations are used in the text and figures: **Female genitalia:** A,  
230 atrium; CD, copulatory ducts; CO, copulatory openings; Fd, fertilization ducts; Sa,  
231 secretory ampullae (*sensu* Dankittipakul, Tavano, and Singtripop [48]); S, spermatheca.

232 **Male genitalia:** B, male pedipalp bulb; Cy, cymbium; C, pedipalp conductor; E,  
233 embolus; Fe, femur; H, basal hematodocha; Pa, patella; RTA, tibia retro lateral  
234 apophysis; Sd, sperm duct; sT, sub tegulum; T, tegulum; Ti, tibia.

235

## 236 **Results**

237 **Literature review.**—We reviewed publications that directly focus on genital  
238 asymmetry as well as taxonomic literature that tangentially describe or illustrate

239 asymmetrical morphology. We found ca. 150 species across thirteen spider families  
 240 with indications of asymmetric genitalia (Table 1) representing less than 0.3% of all  
 241 spider species World Spider Catalog [55]; and about 13.5% of all the currently valid  
 242 species in the genera reviewed for this study. Synspermiata has at least five families  
 243 (Ochyroceratidae, Oonopidae, Pholcidae, Sicariidae and Telemidae) where some kind of  
 244 asymmetry has evolved accounting for ca. 90 species (Table 1). Asymmetry was found  
 245 in both female and male genitalia; female asymmetry is more frequent, being found in at  
 246 least five oonopid, three sicariid, two pholcid and two ochyroceratid genera. In addition,  
 247 most genera in the Telemidae have evolved a single sac-like seminal receptacle; some  
 248 species show seemingly asymmetric modifications of this sac, leaning and sometimes  
 249 spiraling to one side. However, intraspecific variation has not been documented. Male  
 250 asymmetry is less common, being found in three oonopid and two pholcid genera, and  
 251 ambiguously suggested for two ochyroceratid species [18,56]. Nevertheless, it is  
 252 prevalent in *Escaphyella* and *Paradysderina*, where about 20 species show asymmetric  
 253 male pedipalps (2 e).

254

255 **Table 1.- Spider taxa with genital asymmetry reports in literature.**

| Family              | Species                       | External (E) /<br>Internal (I) | Female /<br>Male | Type of<br>asymmetry | Distribution         | Source                                     |                                                     |
|---------------------|-------------------------------|--------------------------------|------------------|----------------------|----------------------|--------------------------------------------|-----------------------------------------------------|
| <b>Synspermiata</b> |                               |                                |                  |                      |                      |                                            |                                                     |
| <b>Oonopidae</b>    | <i>Aschnaonops marta</i>      | E                              | M                | DA/AS*               | Neotropical          | Platnick et al. [57]                       |                                                     |
|                     | <i>Aschnaonops meta</i>       | I                              | F                | AS*                  | Neotropical          | “                                          |                                                     |
|                     | <i>Escaphiella</i> (8 spp)    | E                              | M                | DA/AS*               | Neotropical          | Platnick and Dupérré [46]                  |                                                     |
|                     | <i>Lionneta</i> (2 spp)       | I                              | F                | AS/FA*               | Seychelles           | Saaristo [58]                              |                                                     |
|                     | <i>Ischnothyreus jivani</i>   | I                              | F                | AS/FA*               | Seychelles           | “                                          |                                                     |
|                     | <i>Paradysderina</i> (12 spp) | E                              | M, F             | AS/FA*               | Neotropical          | Platnick and Dupérré [19]                  |                                                     |
|                     | <i>Reductoonops</i> (2 spp)   | I                              | F                | AS*                  | Neotropical          | Platnick and Berniker [59]                 |                                                     |
|                     | <i>Triaeris</i> (5 spp)       | I                              | F                | DA*                  | Pantropical          | Platnick et al. [60]                       |                                                     |
|                     | <b>Ochyroceratidae</b>        | <i>Althepus</i> (5 spp)        | I                | F                    | AS/FA*               | South-East Asia                            | Deeleman-Reinhold [61]; Li et al. [16]              |
|                     |                               | <i>Speocera</i> (8spp)         | I, E*            | M*, F                | AS*                  | Pantropical                                | Lin, et al. [20]; Tong and Li [56]; Tong et al.[18] |
| <b>Pholcidae</b>    | <i>Mesavolivar yurani</i>     | I                              | F                | DA*                  | Venezuela            | Huber [15]                                 |                                                     |
|                     | <i>Metagonia</i> (9 spp)      | I                              | F                | AS*                  | Bolivia, Brazi, Peru | Ferreira et al. [62]; Huber [63]; Huber et |                                                     |

|                          |                                        |                  |                    |           |                                              |                                                                                             |
|--------------------------|----------------------------------------|------------------|--------------------|-----------|----------------------------------------------|---------------------------------------------------------------------------------------------|
|                          |                                        |                  |                    |           |                                              | al. [64]; Machado, Ferreira and Brescovit [63]; Perez-Gonzalez and Huber [65]               |
|                          | <i>Metagonia mariguitarensis</i>       | E male/ I female | M, F               | DA        | Brazil                                       | Huber [63]                                                                                  |
|                          | <i>Panjange lanthana</i> group (3 spp) | E                | M                  | DA*       | Philippines                                  | Huber [10]                                                                                  |
| <b>Sicariidae</b>        | <i>Hexophthalma</i> (3spp)             | I                | F                  | AS/FA *   | South America                                | Magalhaes, Brescovit, and Santos [17]                                                       |
|                          | <i>Loxosceles</i> (4spp)               | I                | F                  | AS/FA *   | North to South America; Africa               | Gertsch and Ennik [66]; Lotz [67]                                                           |
|                          | <i>Sicraius</i> (7 spp)                | I                | F                  | AS/FA *   | South America                                | Magalhaes, Brescovit, and Santos [17]                                                       |
| <b>Telemidae</b>         | <i>Cangoderses christae</i>            | I                | F                  | AS/FA *   | Côte d'Ivoire                                | Wang and Li [68]                                                                            |
|                          | <i>Kinku turumanya</i>                 | I                | F                  | AS/FA *   | Ecuador                                      | Dupérré and Tapia [69]                                                                      |
|                          | <i>Telema</i> (14 spp)                 | I                | F                  | AS/FA *   | East and South-East Asia                     | Wang and Li [70]; Wang and Li [71]; Lin and Li [72]; Lin, Pham and Li [20]                  |
| <b>Entelegynae</b>       |                                        |                  |                    |           |                                              |                                                                                             |
| <b><u>Araneoidea</u></b> |                                        |                  |                    |           |                                              |                                                                                             |
| <b>Theridiidae</b>       | <i>Asygyna</i> (2 spp)                 | E, I             | F                  | AS        | Madagascar                                   | Agnarsson [22]                                                                              |
|                          | <i>Echinotheridion</i> (9 spp)         | E                | M                  | AS        | Neotropical                                  | Knoflach [41]                                                                               |
|                          | <i>Tidarren</i> (24 spp)               | E                | M                  | AS        | America, Tropical Africa                     | Knoflach and van Harten [14]                                                                |
| <b><u>RTA</u></b>        |                                        |                  |                    |           |                                              |                                                                                             |
| <b>Cithaeronidae</b>     | <i>Cithaeron</i> (2 spp)               | I                | F                  | CA        | South America, South-East Asia, North Africa | Platnick [73]; Platnick and Gajbe [45]; Ruiz and Bonaldo [28]                               |
| <b>Hahniidae</b>         | <i>Neoantistea</i> (2 spp)             | I                | F                  | FA/AS/CA* | Nearctic                                     | Opell and Beatty [26]                                                                       |
| Gnaphosidae              | <i>Apopyllus</i> (9 spp)               | I                | F                  | FA/CA*    | Neotropical                                  | Azevedo, et al.[25]                                                                         |
| <b>Liocranidae</b>       | <i>Jacaena mihun</i>                   | I                | F                  | CA        | Thailand,                                    | Deeleman-Reinhold, [47]                                                                     |
|                          | <i>Teutamus politus</i>                | E, I             | M <sup>a</sup> , F | DA        | Thailand, Malaysia                           | ”                                                                                           |
|                          | <i>Teutamus</i> (4 spp)                | E, I             | F                  | AS        | Sumatra                                      | ”                                                                                           |
| <b>Phrurolithidae</b>    | <i>Scotinella</i> (2 spp)              | E, I             | F                  | AS        | USA                                          | Penniman [42]                                                                               |
| <b>Prodidomidae</b>      | <i>Moreno ramirezi</i>                 | I                | F                  | CA        | Argentina                                    | Platnick, Shadab, and Sorkin [74]                                                           |
| <b>Trachelidae</b>       | <i>Trachelas</i> (7 spp)               | I                | F                  | CA        | North and Central America                    | Platnick and Shadab [44]; Platnick and Shadab [43]; Rivera-Quiroz and Alvarez-Padilla [27]. |

256 Summary of cases and types of spider genital asymmetry, mostly from taxonomic  
 257 literature. (AS, antisymmetry; CA, chaotic asymmetry; DA, directional asymmetry; FA,  
 258 fluctuating asymmetry). \*indicates cases where information is scarce, ambiguous or few  
 259 specimens were examined. <sup>a</sup> described in the present work.  
 260

261 In Entelegynae, more than 60 species in eight families show genital asymmetry. Almost  
 262 half of the cases were found in the Theridiidae with ca. 35 species in three genera  
 263 (*Asygyna*, *Echinotheridion*, and *Tidarren*). The rest are scattered among seven families

264 in the RTA clade (Cithaeronidae, Hahniidae, Gnaphosidae, Liocranidae, Phrurolithidae,  
265 Prodidiomidae, Trachelidae) (Table 1). Most genital asymmetry reports in Entelegynae  
266 include only female genitalia. Female internal asymmetry was the most common,  
267 showing a wide range of variation on spermathecae and copulatory ducts (Fig. 3d-h).  
268 Female external asymmetry was only found in *Asygyna* (Fig. 3a), *Scotinella* (Fig. 3b)  
269 and *Teutamus* (Fig. 7a,d). Male genital asymmetry in Entelegynae had only been  
270 reported in the theridiid *Echinotheridion* and *Tidarren* (Fig. 3c); these two genera  
271 exemplify a unique behavior that results in genital mutilation; however, normal  
272 developmental asymmetry, rather than behaviorally induced, had never been described  
273 in Entelegynae literature before this work.

274

275 Most male asymmetries in literature appear to be AS with the exception of the DA in  
276 *Metagonia mariguitarensis*, two species of *Escaphiella* and the newly described  
277 pedipalps of *Teutamus politus*. Three species of the *Panjange lanthana* group, and  
278 several more of *Aschnaonops*, *Escaphiella*, and *Paradysderyna* might also be DA but  
279 only a few specimens have been examined. Female genital asymmetry most of the times  
280 involves only internal structures such as ducts, bursa, and spermatheca. Both AS (Fig.  
281 3a-b) and CA (Fig. 3d-h) are relatively common. External asymmetry is not usual and  
282 had only been described in *Asygyna*, Theridiidae (Fig. 3a) and *Scotinella*, Phrurolithidae  
283 (Fig. 3b) (apparently AS); and *Teutamus*, Liocranidae (Fig. 7) (DA and apparent AS).

284

285

286 **Remarks on *Teutamus politus* Thorell, 1890**

287 (Figures 5-7)

288 A total of 60 female and 35 male specimens were collected as a result of our fieldwork  
289 in Thailand. External female genitalia and male pedipalps were observed and compared  
290 for all specimens. Four females and five males had their genitals dissected and prepared  
291 for detailed examination.

292

293 **Male genital morphology-** All pedipalp segments with the exception of the bulb (B)  
294 seem to be completely symmetrical. Bulbs show at least three clear asymmetries  
295 between the right and left sides: i) left B is slightly wider than the right one (Fig. 5b,e; c,  
296 f; 6a); ii), left side has a flatter and wider tegulum (T) (Fig. 5f) projected anteriorly in  
297 retrolateral view (Fig 5e); and iii) the left conductor (C) is conical and straight (Fig. 6b),  
298 slightly pointing towards the cymbium (Cy) in lateral view (Fig. 5d, f); while the right C  
299 is flattened, hook-shaped (Fig. 6c) and pointing away of the Cy in lateral view (Fig. 5a ,  
300 c). There is no apparent difference in the length and shape of the emboli (E) or the  
301 spermatic ducts (Sd). This suggests that the asymmetry might not be linked to  
302 functional distinction of left and right pedipalp.

303

304 **Figure 5.- Asymmetric male genitalia of *Teutamus politus*.** Right pedipalp: a)  
305 prolateral view. b) retrolateral view. c) ventral view. Left pedipalp: d) prolateral  
306 view. e) retrolateral view. f) ventral view. Scale bars: **a, b, d, e** = 0.5 mm. **c, f** =  
307 0.25 mm.

308

309 **Figure 6.- Expanded asymmetric male genitalia of *Teutamus politus*.** a) comparative  
310 retrolateral view. b) left pedipalp prolateral view. c) right pedipalp prolateral  
311 view. Scale bars: **a** = 0.5 mm. **b, c** = 0.25 mm.

312

313

314 **Female genital morphology-** Externally, the epigynal plate is flattened and fused to the  
315 ventral scutum (Fig. 7a). Copulatory openings (CO) are placed close together, forming  
316 an atrium facing the left side of the venter and located anteriorly to the bean-shaped

317 spermatheca (Fig. 7a-c). Left spermatheca is slightly shorter than right one (Fig. 7c).  
318 Copulatory ducts (CD) are equally long. Right CD anterior to the right spermatheca, left  
319 CD located in between both spermathecae (Fig. 7c, e). Asymmetric attachment of CD to  
320 spermathecae with the right being anterior to that of the left one (Fig. 7b, c). Both CD  
321 have secretory ampullae (Sa) close to their middle portion (Fig. 7b, c). Fertilization  
322 ducts (Fd) short and simple, originating from the posterior end of the spermatheca and  
323 pointing in the same direction (Fig. 7 e). Despite the clear difference in shape, there is  
324 no morphological evidence that suggests functional differentiation between right and  
325 left structures.

326

327 **Figure 7.- Asymmetric female genitalia of *Teutamus politus*.** a) epigynum ventral  
328 view. b) dissected and cleared vulva ventral view. c) same, dorsal view. d)  
329 vulva, ventral view, SEM. e) same, dorsal view. Scale bars: **a, b, c** = 0.25 mm. **d**  
330 = 150  $\mu$ m. **e** = 100  $\mu$ m

331

332 **Behavioral observations-** A total of 25 different couples were tested. Initially couples  
333 were formed with males and females from the same collection site. Males were more  
334 difficult to keep alive than females with most males dying within three days of  
335 collection. Due to this, males and females from different sites were also coupled. There  
336 were no successful observations of either courtship or mating. Spiders preferred to  
337 explore the dish or stand still and, whenever they got too close, they usually avoided  
338 each other. In general, interactions between females and males were brief and non-  
339 aggressive. Four females laid egg sacs in the Falcon tubes.

340

## 341 **Discussion**

342

343 **Literature review.**—Taxonomic literature is the biggest repository of primary  
344 descriptive data on the world’s biodiversity. However, illustrations and description are  
345 difficult to interpret and might be influenced by the number of studied specimens, state  
346 of preservation, preparation artifacts and even illustration techniques. As an example,  
347 the species *Cithaeron indicus* shows clear asymmetric female genitalia in its original  
348 description [45] but appears symmetrical in a later publication [75] (Fig. 8). Illustrators  
349 sometimes avoid introducing variation by drawing one half of a given structure and then  
350 tracing the other side based on it. This might simplify understanding and drawing some  
351 structures but could also lead to overlooking important information in the illustration  
352 process. Similar biases have been observed in some species of *Trachelas* [43,44] and  
353 could be present elsewhere. As pointed out by Huber and Nuñez [10], preparation  
354 artifacts might also play a role in the identification and interpretation of asymmetric  
355 structures. Weakly sclerotized internal genitalia (as that typically found in non-  
356 Entelegynae spiders) are often prone to create artifacts during specimen preparation and  
357 an interpretation without sufficient knowledge of intraspecific variation might be  
358 misleading. Entelegyne spiders tend to have more heavily sclerotized bodies being less  
359 sensible during the preparation process and allowing a more robust interpretation of  
360 their genital morphology.

361

362 **Figure 8.- Example of illustration bias.** Vulva, ventral view. a) *Cithaeron indicus*;  
363 modified Platnick and Gajbe [45]. b) Same; modified from Gajbe [75].

364

365 Descriptions of male spider genitalia are also subject to preparation artifacts or  
366 methodological biases. Male genitalia preparation and examination is usually done by  
367 dissecting, studying and illustrating only one pedipalp. Although this is a very efficient  
368 approach and does not represent a problem on most occasions, some cases of

369 asymmetric genitalia might go unnoticed. This has resulted in a more difficult  
370 assessment of male asymmetry; as an example, *Metagonia mariguitarensis* was  
371 believed to be the only species with male genital asymmetry [8]. However, DA in males  
372 of *T. politus* had never been discovered before, apparently because the right male  
373 pedipalp had simply been overlooked in previous descriptions. Similarly two *Speocera*  
374 species [18,56] have their male pedipalps ambiguously described as “asymmetric” but  
375 no more details were given.

376

377 In comparison, recent revisionary studies on the oonopid genera *Aschnaonops*,  
378 *Escaphiella*, *Paradysderyna* and *Reductonops* [19,46,57,59] took special care in  
379 comparing the right and left male pedipalps revealing many more cases of genital  
380 asymmetry. In all of these, male pedipalps show clear differences in bulb development  
381 and embolus shape between right and left (Fig. 2 e). In at least two species of  
382 *Escaphiella* [46] enough specimens have been examined to suggest that asymmetry in  
383 these species is directional.

384

385

386 **Evolutionary trends of genital asymmetry.**— We found evidence of ca. 150 cases of  
387 asymmetry in spider genitals in thirteen different families. In previous broad-scope  
388 reviews, only some examples in Pholcidae and Theridiidae had been taken in account.  
389 Reports on insects suggest that genital asymmetry rarely appears isolated and is usually  
390 a shared trait between closely related species [3,4,76]. Here, we found some similar  
391 patterns with several species within a genus showing at least one type of genital  
392 asymmetry. This pattern is more common in the Synespermiata, but was also observed  
393 in Entelegynae (Table 1). Although the known number of cases and families with



394 asymmetrical genitalia has increased significantly, this still represents less than 0.3% of  
395 all known spider species. The low incidence of genital asymmetry in spiders has been  
396 mainly explained by the presence of two sperm transfer structures in the male [1,3].  
397 Huber, Sinclair, and Schmitt [1] remark that in comparison to insects, most spider  
398 asymmetry originates in females instead of males, and most insect asymmetry originates  
399 as DA, while most or all spider asymmetry originates as AS. Many examples support  
400 the first claim, which also fits a cryptic female choice hypothesis [9]. Nevertheless, we  
401 found numerous “new” examples of male asymmetry hidden in taxonomic literature  
402 (Table 1), highlighting the many cases in the Oonopidae where male asymmetry has  
403 apparently not coincided with modified female genitalia. As for the second claim, we  
404 found that DA might not be as rare as previously thought. Examples of DA include two  
405 confirmed cases in *Metagonia* [8] and *Teutamus*, both involving male and female  
406 genitalia; two more in *Escaphiella* [46], that include only male pedipalp; and some  
407 more in *Panjange* [10], *Mesovolivar* [15], and three Oonopidae genera that suggest  
408 asymmetry directionality but are not conclusive.

409

410 Many spider asymmetries seem to fit in the AS category, although only a handful have  
411 been evaluated for the appearance of right or left-sided asymmetries within a sample as  
412 in Phrurolithidae and Theridiidae [22]. Also, we found some cases in which female  
413 copulatory ducts are long, coiled and entangled in a way that does not fit any of the  
414 three known types of asymmetry. We called this chaotic asymmetry (CA) because the  
415 great variation between individuals of the same species does not allow distinguishing  
416 either a dextral or a sinistral form.

417

418 Other cases difficult to assess are: the reduction of spermathecae to a single receptacle,  
419 as seen in some oonopids [35,51,52], pholcids [62,63,65], and telemids [20,68–72] (Fig.  
420 2f, g); and the presence of odd numbered spermathecae in some sicariids [17,66,67,77]  
421 and ochyroceratids [16,61,78] (Fig. 2 b, c). Both phenomena can sometimes generate a  
422 seemingly asymmetric morphology. Although good illustrations and photographs of  
423 these are available in literature (e.g. figs. 20: Magalhaes, Brescovit, and Santos [17];  
424 figs 14 and 19: Li *et al.* [16]; fig. 8: Lin, Pham and Li [20]; fig. 7: Wang and Li [70])  
425 only some cases in the Sicariidae [17,66] have reported intraspecific variation.

426  
427 A correct interpretation of the type of asymmetry based only on the available literature  
428 is complicated. Many cases describe single specimens or small samples and do not  
429 include enough information to assess the character variation within the species. This is a  
430 key piece of information since the proportions of forms within the population are crucial  
431 to distinguish the type of asymmetry and the evolutionary mechanisms behind it. Here  
432 we include examples that, to the best of our knowledge, fit the definition of each type of  
433 genital asymmetry and give hypotheses that could explain their origin.

434  
435 **Fluctuating Asymmetry (FA).**— This kind of asymmetry is defined by van Valen [5]  
436 as “the inability of organisms to develop in precisely determined paths”. In other words,  
437 FA describe random morphological fluctuations around a symmetric mean  
438 [3,5,33,79,80]. FA incidence, relation to environmental factors, and its influence within  
439 populations has been studied on some Lycosidae and Pholcidae [17–21]. Here we found  
440 that some cases, like the hahniid *Neoanthistea*, some oonopid and telemid genera  
441 (mentioned as FA\* in Table 1), and other “malformed” specimens in literature might be  
442 cases of FA. Similarly, the great intraspecific variation observed in the female genitalia

443 of some sicariids [17,66], range from asymmetries in number, size and shape of  
444 spermathecae to almost symmetric structures. This suggests that asymmetries in this  
445 family and similar cases in the ochyroceratid *Althepus* [16,61] might be fluctuating.  
446 Nevertheless, most FA asymmetries require more specimens and careful examination to  
447 determine better the nature of the observed phenotypes. A few species that show AS  
448 (*Scotinella britcheri* and *S. fratella*) and all species with CA (*Cithaeron praedonius*,  
449 *Jacaena mihun*, among others) show great morphological variation of female internal  
450 genitalia within the population; however, these variations are never around a symmetric  
451 mean and thus we do not consider them to be fluctuating.

452

453 **Antisymmetry (AS).**— We found this type of asymmetry in two different families and  
454 at least four genera; notably, all known species of *Echinotheridion* and *Tidarren* share  
455 this trait. This specific case of AS induced by an uncommon genital automutilation  
456 behavior may also be the best studied and understood. In these theridiid genera, male  
457 spiders show no preference for either left or right pedipalp self-emasculatation, and no  
458 selection of right or left form by females has been observed. Likewise, females of  
459 *Scotinella britcheri* and *S. fratella* show two basic forms with some range of variation  
460 in-between but no significant predominance within the studied population [42]; *Asygina*  
461 *huberi* and *A. coddingtoni* [22], and probably some *Teutamus* species like *T. brachiatus*,  
462 *T. poggi*, and others (as illustrated by Dankittipakul, Tavano, and Singtripop [48]) also  
463 fit this AS model. Likewise, some asymmetric species in the Ochyroceratidae,  
464 Oonopidae, Pholcidae, and Telemidae could show AS. However, larger numbers of  
465 specimens are needed to identify the proportion of forms and type of asymmetry.

466

467 Palmer (1996) divided asymmetry as genetic (larval) and external (post-larval)  
468 depending on the developmental stage where it is originated. In spiders, genital  
469 development is only apparent after the last molt. Therefore, the exact moment where AS  
470 appears, especially in females, is difficult to interpret. Evidence on snails [81],  
471 crustaceans [6], and insects [6,76,82] suggest genetic AS to be an evolutionarily  
472 unstable or transitional state between symmetry and DA, or even a reversal phase from  
473 DA [3,6]. Similarly, a genetic assimilation process of external AS could ultimately lead  
474 to DA [3,6,83]. We consider the few confirmed spider AS to represent both types of  
475 asymmetry: genetic in *Asygyna* and *Scotinella*, and external in *Echinotheridion* and  
476 *Tidarren*.

477

478 Another interesting observation is the sex biased incidence of AS. This seems to be also  
479 the case in some insect groups like Odonata, Orthoptera, Mantodea, and others [1,2,76].  
480 In *Asygyna* and *Scotinella*, asymmetry has only been reported in females; while the  
481 theridiids *Echinotheridion* and *Tidarren* only show asymmetry on male pedipalps.  
482 Appearance of AS in *Asygyna* and *Scotinella* might be related to an intrasexual  
483 competition between females; while, AS in *Echinotheridion* and *Tidarren* is considered  
484 an example of antagonistic co-evolution derived from the extreme size dimorphism  
485 between sexes [14,41,50–52]. Neither mechanical, behavioral nor functional  
486 differentiation between chiral forms has been reported in the cases above.

487

488 **Chaotic asymmetry (CA).** — This new category of asymmetry does not fit the  
489 definition of any of the three traditional types. Females usually develop long and  
490 convoluted copulation ducts where the great variation between specimens does not  
491 allow a clear distinction between a dextral and sinistral form. All known examples of

492 this type of asymmetry are found in the Entelegynae clade. Platnick [73] mentioned for  
493 *Cithaeron praedonius* (Cithaeronidae): “No two females show identical patterns of  
494 epigynal duct coiling; for that matter, no individual specimen shows identical coiling of  
495 the ducts of the right and left sides”. Similar morphological variation (Fig. 3d-h) has  
496 been observed in some species of the following genera: *Apopyllus* (Gnaphosidae) [25],  
497 *Neoantistea* (Hahniidae) [26], *Moreno* (Prodidiomidae) [74], *Jacaena*, (Liocranidae)  
498 [49] and *Trachelas* (Trachelidae) [27,43,44].

499

500 The origin of these internal genital modifications has not been investigated and its  
501 relation to a functional differentiation between sides or packing of other internal organs  
502 cannot be ruled out. We hypothesize that the development of this kind of asymmetry is  
503 related to complexity in internal female genitalia and this could explain the absence of  
504 examples in the genitally simple Synspermiata. The absence of a clear right/left  
505 pattern and great variation between individuals suggest that copulatory duct shape is not  
506 under a strict selection. This might be related to a simplification in pedipalp sclerite  
507 complexity and embolus length (as seen in *Trachelas*, *Jacaena* and *Moreno*). In  
508 contrast, some *Apopyllus* males have fairly complex male genitals with an extremely  
509 long embolus that usually coils around the bulb. Female ducts show slight asymmetries  
510 between right and left sides and authors mention internal variation between conspecific  
511 females. This genus also shows intraspecific variation in the RTA and external genitalia  
512 and it is hypothesized to be an instance of male-female coevolution [25]. The cases of  
513 *Cithaeron indicus*, *Moreno ramirezi* and both *Neoantistea* species are doubtful; in the  
514 former, the male is not known, and in *Moreno* and *Neoantistea*, species were described  
515 based on just one female or variation was not documented; the observed asymmetry

516 could be fluctuating, antisymmetric, a developmental abnormality or even an artifact of  
517 preparation.

518

519 If pedipalp bulb sclerite reduction is related to the appearance of CA, the question  
520 would be why is it so rare? Within Entelegynae, several groups have reduced male  
521 pedipalp complexity; however, CA has not evolved nearly as many times. This might be  
522 explained by the evolution of long and convoluted CD prior to male sclerite reduction  
523 which would, hypothetically, reduce selective pressure on the female copulatory ducts.

524

525 **Directional asymmetry (DA).**— In insects, DA is the most common type of  
526 asymmetry [1,2]; however, in spiders, DA seems to be quite rare. So far, in  
527 Synesperiata, only the pholcid *Metagonia mariguitarensis* [8] had been confirmed as  
528 DA; however, there are reports of consistent one-sided asymmetries in other members  
529 of this clade. In *Escaphiella gertschi* and *E. itys*, all examined males have  
530 developmental differences between right and left pedipalp [46]. More asymmetric male  
531 pedipalps have been described for three *Panjange* species of the *lanthana* group [10],  
532 *Aschnaonops marta* [57], at least six species of *Paradysderina* [19], and several  
533 species of *Escaphiella* [46]. Likewise, female internal genitalia of *Mesovolivar yurani*  
534 [15]; and some species of *Paradysderina* [19], *Reductoonops* [59] and *Triaeris* [60]  
535 show asymmetries that seem to be consistent within their samples; nevertheless, the  
536 number of specimens examined in many cases is too small to confirm directionality.

537

538 The story seems to be different for Entelegynae spiders where more complex  
539 development of genitals might inhibit the evolution of directional asymmetry. Although  
540 implicit in the description of *Teutamus politus* female genitalia by Deeleman-Reinhold

541 (2001), the present study is the first report of DA in the entelegyne clade. *Teutamus*  
542 *politus* is also the first example of developmental male genital asymmetry in the  
543 Entelegynae. Previously, male asymmetry in this clade was only known from  
544 teratogenic specimens and the unique AS phenotype created by self-emasculatation in  
545 *Tidarren* and *Echinotheridion*.  
546  
547 Putative cases of male DA in *Escaphiella* and other oonopids may not be related to  
548 modifications in female genitalia [46,57] but to functional segregation of the right and  
549 left pedipalps. Similarly, the genus *Triaeris* has many cases of female genital  
550 asymmetry that have not been linked to male pedipalp modifications. In fact, some  
551 species of this genus are believed to be parthenogenetic [60]. In contrast, directional  
552 genital asymmetries in *M. mariguitarensis* and *T. politus* have been found in both sexes,  
553 which might indicate that selection by female choice is the underlying cause. In these  
554 species, males would have to change morphologically or modify mating positions to be  
555 able to have successful copulation. Morphological modifications in both sexes have  
556 been confirmed for *M. mariguitarensis* [8] and *T. politus*; however, the implications for  
557 mating behavior continue to be a mystery.  
558  
559 Changes in mating position have been suggested to be associated with many cases of  
560 DA in insect genitalia [1,4,11]. Unfortunately we were not able to test this in the case of  
561 *T. politus* using live specimens; nevertheless, observations in *Agroeca* Bristowe (1958)  
562 and other RTA spiders [12,85] suggest that copulation is achieved by the male climbing  
563 over the female and stretching over a side while the female slightly turns her abdomen;  
564 this process is alternated between right and left side. In *T. politus*, female genital  
565 opening location makes it virtually impossible to have successful mating attempt from a

566 right-side position. Instead, a male must insert both pedipalps always from the left side  
567 in relation to the female body. Morphological modifications like: left bulb being slightly  
568 bigger (Fig. 5c, f), having a ventrally flattened tegulum (Fig. 5f), and a straight conical  
569 conductor (Fig. 5f) instead of the flattened, hook-shaped conductor of the right side  
570 (Fig. 5c) are consistent with this hypothesis. In addition, this evidence seems to back the  
571 hypothesis discussed by Schilthuisen (2013) and Huber, Sinclair, and Schmitt (2007)  
572 stating that in spiders asymmetry is most likely female-initiated and male changes  
573 appear as an evolutionary response.

574

575

## 576 **Conclusions**

577

578 Genital evolution is a complex and interesting topic. The appearance of asymmetric  
579 morphologies is a puzzling phenomenon that has often been overlooked. Here we  
580 reported *T. politus* as the first case of directional asymmetry, and the first  
581 developmental asymmetry in male genitals in Entelegynae. We also searched for as  
582 many cases as possible in taxonomic literature; however, many more might be waiting  
583 to be (re)discovered. Our review showed that there have been multiple origins of genital  
584 asymmetry in at least thirteen families, and in some cases (e.g. Oonopidae, Pholcidae,  
585 Theridiidae, Liocranidae) two or more within the same family. A correct assessment of  
586 genital asymmetry based on taxonomic legacy literature is difficult mainly due to the  
587 lack of data, description and illustration biases, and number of specimens and variation  
588 descriptions.

589



590 As has been shown by previous works on genital asymmetry in insects and spiders,  
591 there is no single explanation for the evolution of this trait, but some generalizations can  
592 be made. In contrast to insects and other arthropod groups, the low number of genital  
593 asymmetric species in spiders might indicate that the appearance of these morphological  
594 modifications might reduce subsequent speciation rates or even increase extinction  
595 rates; specialized lineages tend to have a reduced capacity to diversify and therefore  
596 might be considered evolutionary dead ends [86]. However, our observations indicate  
597 that cases of sexual asymmetry in spiders, although rare, are more common than was  
598 previously thought. Furthermore, they have evolved independently several times but  
599 rarely appear isolated and most of the times seem to be clustered within a genus or  
600 closely related genera, as in the cases of Oonopidae, Pholcidae, Theridiidae, and  
601 probably Liocranidae. The evolution of genital asymmetries in spiders might be a good  
602 candidate to be tested as a potential evolutionary dead end.

603

604 Several hypotheses for the appearance of asymmetry in spiders have been proposed and  
605 include natural selection, sexual selection by female choice and antagonistic co-  
606 evolution (not mutually exclusive). We considered *Echinotheridion* and *Tidarren* to be  
607 examples of antagonistic co-evolution where the male has evolved self-emasculatation in  
608 response to the extreme sexual dimorphism in size and aggressive behavior in the  
609 female. No selection between left and right is apparent in these genera, thus no  
610 directionality is observed. DA cases like *T. politus* seem to support the hypothesis that  
611 correlates changes in mating position to genital asymmetry; however, other examples  
612 still need to be studied. DA in *T. politus* and some pholcid examples, AS in *Scotinella*  
613 and *Asygyna*, and CA cases in *Jacaena*, *Cithaeron* and *Trachelas* support the hypothesis  
614 of female-initiated asymmetry in spiders; however, male DA in Oonopidae and AS in

615 some theridiids conflict with this explanation. Further and more detailed study on  
616 internal genitalia and comparative study of male right and left pedipalps may yield new  
617 and valuable information to explain the evolutionary pattern of genital asymmetry. We  
618 hope that this review will aid in the study, development and testing of hypotheses on  
619 sexual evolution. We specifically hope it sparks discussions on the complex interactions  
620 between males and females, and appearance of interesting phenomena like genital  
621 asymmetry.

622

## 623 **Acknowledgements**

624 Thanks to Joe Dulyapat for his great assistance and participation during our fieldwork in  
625 Thailand. Thanks to Gustavo Hormiga, Ivan Magalhaes and Martin Ramirez for their  
626 remarks and suggestions. Thanks to Fernando Álvarez-Padilla Lab. and Francisco J.  
627 Salgueiro-Sepulveda for providing pictures of *Tidarren sisyphoides* and *Triaeris*  
628 *stenaspis*. All *Teutamus* specimens used in this study were collected under permit  
629 5830802 emitted by the Department of National Parks, Wildlife and Plant Conservation,  
630 Thailand.

631

632

## 633 **References**

- 634 1. Huber BA, Sinclair BJ, Schmitt M. The evolution of asymmetric genitalia in spiders and  
635 insects. Vol. 82, Biological Reviews. 2007. p. 647–98.
- 636 2. Schilthuizen M. The evolution of chirally dimorphic insect genitalia. Tijdschr voor  
637 Entomol [Internet]. 2007;150(December):347–54. Available from:  
638 <http://www.nev.nl/tve/pdf/te0150347.pdf>
- 639 3. Schilthuizen M. Something gone awry: unsolved mysteries in the evolution of  
640 asymmetric animal genitalia. Anim Biol [Internet]. 2013;63(1):1–20. Available from:  
641 <http://booksandjournals.brillonline.com/content/journals/10.1163/15707563-00002398>
- 642 4. Schilthuizen M, de Jong P, van Beek R, Hoogenboom T, zu Schloctern MM. The  
643 evolution of asymmetric genitalia in Coleoptera. Philos Trans R Soc B Biol Sci.  
644 2016;371(20150400).

- 645 5. van Valen L. A Study of Fluctuating Asymmetry. *Evolution* (N Y) [Internet].  
646 1962;16(2):125. Available from: <http://www.jstor.org/stable/2406192?origin=crossref>
- 647 6. Palmer AR. From symmetry to asymmetry: phylogenetic patterns of asymmetry  
648 variation in animals and their evolutionary significance. *Proc Natl Acad Sci U S A*.  
649 1996;93(25):14279–86.
- 650 7. van Dongen S. Fluctuating asymmetry and developmental instability in evolutionary  
651 biology: past, present and future. *J Evol Biol* [Internet]. 2006;19(6):1727–43. Available  
652 from: <http://www.ncbi.nlm.nih.gov/pubmed/17040371>
- 653 8. Huber BA. Evidence for functional segregation in the directionally asymmetric male  
654 genitalia of the spider *Metagonia mariguitarensis* (Gonzlez-Sponga) (Pholcidae:  
655 Araneae). *J Zool* [Internet]. 2004;262(3):317–26. Available from:  
656 <http://doi.wiley.com/10.1017/S0952836903004709%5CnCnCourtMatSP>
- 657 9. Eberhard WG, Huber BA. Spider Genitalia. *Evol Prim Sex Characters Anim*. 2010;249–  
658 84.
- 659 10. Huber BA, Nuñez OM. Evolution of genital asymmetry, exaggerated eye stalks, and  
660 extreme palpal elongation in Panjange spiders (Araneae: Pholcidae). *Eur J Taxon*  
661 [Internet]. 2015;0(169). Available from:  
662 <http://www.europeanjournaloftaxonomy.eu/index.php/ejt/article/view/291>
- 663 11. Huber BA. Mating positions and the evolution of asymmetric insect genitalia. *Genetica*.  
664 2010;138(1):19–25.
- 665 12. Foelix RF. *Biology of spiders*. 3rd ed. Vol. 14, *Insect Systematics and Evolution*. New  
666 York: Oxford University Press; 2011. 419 p.
- 667 13. Wheeler WC, Coddington JA, Crowley LM, Dimitrov D, Goloboff PA, Griswold CE, et  
668 al. The spider tree of life: phylogeny of Araneae based on target-gene analyses from an  
669 extensive taxon sampling. *Cladistics*. 2016 Dec;
- 670 14. Knoflach B, van Harten A. Palpal loss, single palp copulation and obligatory mate  
671 consumption in *Tidarren cuneolatum* (Tullgren, 1910) (Araneae, Theridiidae). *J Nat*  
672 *Hist*. 2000;34(8):1639–59.
- 673 15. Huber BA. Cryptic female exaggeration: The asymmetric female internal genitalia of  
674 *Kaliana yuruani* (Araneae: Pholcidae). *J Morphol*. 2006;267(6):705–12.
- 675 16. Li F, Liu C, Wongprom P, Li S. Sixteen new species of the spider genus *Althepus*  
676 *Thorell, 1898* (Araneae: Ochyroceratidae) from Southeast Asia. *Zootaxa*. 2018;
- 677 17. Magalhaes ILF, Brescovit AD, Santos AJ. Phylogeny of Sicariidae spiders (Araneae:  
678 Haplogynae), with a monograph on Neotropical Sicarius. *Zool J Linn Soc*. 2017;
- 679 18. Tong Y, Li F, Song Y, Chen H, Li S. Thirty-two new species of the genus *Speocera*  
680 *Berland, 1914* (Araneae: Ochyroceratidae) from China, Madagascar and Southeast Asia.  
681 *Zool Syst*. 2019;44(1):1–75.
- 682 19. Platnick NI, Dupérré N. The Andean Goblin Spiders of the New Genera *Paradysderina*  
683 *and Semidysderina* (Araneae, Oonopidae). *Bull Am Museum Nat Hist*.  
684 2011;364(345):1–121.
- 685 20. Lin Y, Pham DS, Li S. Six new spiders from caves of Northern Vietnam (Araneae:  
686 Tetrablemmidae: Ochyroceratidae: Telemidae: Symphytognathidae). *Raffles Bull Zool*.  
687 2009;

- 688 21. Huber BA. On American ‘Micromerys’ and Metagonia (Araneae, Pholcidae), with notes  
689 on natural history and genital mechanics. *Zool Scr.* 1996;25(4):341–63.
- 690 22. Agnarsson I. Asymmetric female genitalia and other remarkable morphology in a new  
691 genus of cobweb spiders (Theridiidae, Araneae) from Madagascar. *Biol J Linn Soc.*  
692 2006;87(2):211–32.
- 693 23. Dondale CD, Redner JH. The insects and arachnids of Canada. Part 9. The sac spiders of  
694 Canada and Alaska. Araneae: Clubionidae and Anyphaenidae. In: *The insects and*  
695 *arachnids of Canada.* 1982. p. 194.
- 696 24. Knoflach B. Diversity in the copulatory behaviour of comb-footed spiders (Araneae,  
697 Theridiidae). In: Thaler K, editor. *Diversität und Biologie von Webspinnen, Skorpionen*  
698 *und anderen Spinnentieren.* 2004. p. 161–256.
- 699 25. Azevedo GHF, Ott R, Griswold CE, Santos AJ. A taxonomic revision of the ground  
700 spiders of the genus *Apopyllus* (Araneae: Gnaphosidae). *Zootaxa.* 2016;
- 701 26. Opell BD, Beatty JA. The Nearctic Hahniidae (Arachnida: Araneae). *Bull Museum*  
702 *Comp Zool.* 1976;147(9):393–433.
- 703 27. Rivera-Quiroz FA, Alvarez-Padilla F. Three new species of the genus *Trachelas*  
704 (Araneae: Trachelidae) from an oak forest inside the Mesoamerican biodiversity hotspot  
705 in Mexico. *Zootaxa.* 2015;3999(1):95–110.
- 706 28. Ruiz GRS, Bonaldo AB. Vagabond but elusive: Two newcomers to the Eastern Amazon  
707 (Araneae: Cithaeronidae; Prodidomidae). *Zootaxa.* 2013.
- 708 29. Ahtiainen JJ, Alatalo R V., Mappes J, Vertainen L. Fluctuating asymmetry and sexual  
709 performance in the drumming wolf spider *Hygrolycosa rubrofasciata*. *Ann Zool Fennici.*  
710 2003;40(40):281–92.
- 711 30. Hendrickx F, Maelfait JP, Lens L. Relationship between fluctuating asymmetry and  
712 fitness within and between stressed and unstressed populations of the wolf spider *Pirata*  
713 *piraticus*. *J Evol Biol.* 2003;16(6):1270–9.
- 714 31. Uetz GW, Roberts JA, Wrinn KM, Polak M, Cameron GN. Impact of a catastrophic  
715 natural disturbance on fluctuating asymmetry (FA) in a wolf spider. *Ecoscience*  
716 [Internet]. 2009;16(3):379–86. Available from:  
717 <http://www.bioone.org/doi/abs/10.2980/16-3-3261>
- 718 32. Uetz GW, McClintock WJ, Miller D, Smith EI, Cook KK. Limb regeneration and  
719 subsequent asymmetry in a male secondary sexual character influences sexual selection  
720 in wolf spiders. *Behav Ecol Sociobiol.* 1996;38(4):253–7.
- 721 33. Huber BA. Genitalia, fluctuating asymmetry, and patterns of sexual selection in  
722 *Physocyclus globosus* (Araneae: Pholcidae). *Rev Suisse Zool.* 1996;289–94.
- 723 34. Brady AR. The Lynx Spider Genus *Oxyopes* in Mexico and Central America (Araneae:  
724 *Oxyopidae*). *Psyche (New York).* 1975;82(2):189–243.
- 725 35. Hormiga G. A revision and cladistic analysis of the spider family Pimoidae (Araneoidea:  
726 *Araneae*). *Smithson Contrib to Zool.* 1994;549:1–104.
- 727 36. Kaston BJ. Spider Gynandromorphs and Intersexes. *J New York Entomol Soc.*  
728 1961;69(4):177–90.
- 729 37. Kaston BJ. Abnormal Duplication of the Epigynum and Other Structural, Anomalies in

- 730 Spiders. *Trans Am Microsc Soc.* 1963;82(2):220–3.
- 731 38. Kaston BJ. Deformities of External Genitalia in Spiders. *J New York Entomol Soc.*  
732 1963;71(1):30–9.
- 733 39. Palmgen P. On the frequency of gynandromorphic spiders. *Ann Zool Fennici.*  
734 1979;16:183–5.
- 735 40. Knoflach B, Van Harten A. The one-palped spider genera *Tidarren* and *Echinotheridion*  
736 in the Old World (Araneae, Theridiidae), with comparative remarks on *Tidarren* from  
737 America. *J Nat Hist.* 2006;40(25–26):1483–616.
- 738 41. Knoflach B. Copulation and emasculation in *Echinotheridion gibberosum* (Kulczynski,  
739 1899) (Araneae, Theridiidae). *Eur Arachnol.* 2002;
- 740 42. Penniman AJ. Taxonomic and natural history notes on *Phrurolithus fratellus* Gertsch  
741 (Araneae: Clubionidae). *J Arachnol* [Internet]. 1978;6:125–32. Available from:  
742 [http://www.americanarachnology.org/JoA\\_free/JoA\\_v6\\_n2/JoA\\_v6\\_p125.pdf](http://www.americanarachnology.org/JoA_free/JoA_v6_n2/JoA_v6_p125.pdf)
- 743 43. Platnick NI, Shadab M. A revision of the bispinosus and bicolor groups of the spider  
744 genus *Trachelas* (araneae, clubionidae) in north and central america and the west Indies.  
745 *Am Museum Novit.* 1974;(2560):34.
- 746 44. Platnick NI, Shadab M. A revision of the *tranquillus* and *speciosus* groups of the spider  
747 genus *Trachelas* (Araneae, Clubionidae) in North and Central America. *Am Museum*  
748 *Novit* [Internet]. 1974;(2553):1–34. Available from:  
749 <http://www.ncbi.nlm.nih.gov/pubmed/23286187>
- 750 45. Platnick NI, Gajbe UA. Supplementary notes on the ground spider family Cithaeronidae  
751 (Araneae, Gnaphosoidea). *J Arachnol.* 1994;22:32–83.
- 752 46. Platnick NI, Dupérré N. The American Goblin Spiders of the New Genus *Escaphiella*  
753 (Araneae, Oonopidae). *Bull Am Museum Nat Hist.* 2009;328(328):1–151.
- 754 47. Deeleman-Reinhold C. Forest spiders of South East Asia: with a revision of the sac and  
755 ground spiders (Araneae: Clubionidae, Corinnidae, Liocranidae, Gnaphosidae,  
756 Prodidomidae and Trochanterriidae). Leiden : Brill; 2001. 591 p.
- 757 48. Dankittipakul P, Tavano M, Singtripop T. Seventeen new species of the spider genus  
758 *Teutamus* Thorell, 1890 from Southeast Asia (Araneae: Liocranidae). *J Nat Hist.*  
759 2012;46(27–28):1689–730.
- 760 49. Dankittipakul P, Tavano M, Singtripop T. Revision of the spider genus *Jacaena* Thorell,  
761 1897, with descriptions of four new species from Thailand (Araneae: Corinnidae). *J Nat*  
762 *Hist.* 2013;47(23–24):1539–67.
- 763 50. Knoflach B, Benjamin SP. Mating Without Sexual Cannibalism in *Tidarren Sisyphoides*  
764 (Araneae, Theridiidae). *J Arachnol.* 2003;31(3):445–8.
- 765 51. Knoflach B, van Harten A. *Tidarren argo* sp. nov. (Araneae: Theridiidae) and its  
766 exceptional copulatory behaviour: emasculation, male palpal organ as a mating plug and  
767 sexual cannibalism. *J Zool* [Internet]. 2001;254(4):449–59. Available from:  
768 [http://journals.cambridge.org/abstract\\_S0952836901000954](http://journals.cambridge.org/abstract_S0952836901000954)
- 769 52. Agnarsson I. Phylogenetic placement of *Echinotheridion* (Araneae: Theridiidae) - Do  
770 male sexual organ removal, emasculation, and sexual cannibalism in *Echinotheridion*  
771 and *Tidarren* represent evolutionary replicas? *Invertebr Syst.* 2006;

- 772 53. Alvarez-Padilla F, Hormiga G. A Protocol For Digesting Internal Soft Tissues And  
773 Mounting Spiders For Scanning Electron Microscopy. *J Arachnol* [Internet].  
774 2007;35(3):538–42. Available from: <http://www.bioone.org/doi/abs/10.1636/Sh06-55.1>
- 775 54. Coddington JA. A Temporary Slide-Mount Allowing Precise Manipulation of Small  
776 Structures. *Verhandlungen des Naturwissenschaftlichen Vereins Hambg.* 1983;26:291–2.
- 777 55. WSC. World Spider Catalog Version 20 [Internet]. Natural History Museum Bern.  
778 online at <http://www.wsc.nmbe.ch> [4th april 2019]. 2019. Available from:  
779 <http://www.wsc.nmbe.ch/>
- 780 56. Tong Y, Li S. First records of the family Ochyroceratidae (Arachnida: Araneae) from  
781 China, with descriptions of a new genus and eight new species. *Raffles Bull Zool.* 2007;
- 782 57. Platnick NI, Dupérré N, Berniker L, Bonaldo AB. The Goblin Spider Genera  
783 *Prodysderina*, *Aschnaonops*, and *Bidysderina* (Araneae, Oonopidae). *Bull Am Museum*  
784 *Nat Hist.* 2013;(373):1–102.
- 785 58. Saaristo MI. Araneae. In: Gerlach J, Marusik Y, editors. *Arachnida and Myriapoda of*  
786 *the Seychelles islands.* Press Manchester, UK; 2010. p. 306.
- 787 59. Platnick NI, Berniker L. The Neotropical Goblin Spiders of the New Genus  
788 *Reductoonops* (Araneae, Oonopidae). *Am Museum Novit* [Internet].  
789 2014;3811(3811):1–75. Available from: <http://www.bioone.org/doi/abs/10.1206/3811.1>
- 790 60. Platnick NI, Dupérré N, Ubick D, Fannes W. Got Males?: The Enigmatic Goblin Spider  
791 Genus *Triaeris* (Araneae, Oonopidae). *Am Museum Novit.* 2012;(3756):1–36.
- 792 61. Deeleman-Reinhold CL. The Ochyroceratidae of the Indo-Pacific region (Araneae).  
793 *Raffles bulletin of zoology.* 1995.
- 794 62. Ferreira RL, Souza MFVR, Machado EO, Brescovit AD. Description of a new  
795 *Eukoenia* (Palpigradi: Eukoeniidae) and *Metagonia* (Araneae: Pholcidae) from  
796 Brazilian caves, with notes on their ecological interactions. *J Arachnol.* 2011;
- 797 63. Machado EO, Ferreira RL, Brescovit AD. A new troglomorphic *Metagonia* Simon 1893  
798 (Araneae, Pholcidae) from Brazil. *Zootaxa.* 2011;
- 799 64. Huber BA, Rheims CA, Brescovit AD. Two new species of litter-dwelling *Metagonia*  
800 spiders (Araneae, Pholcidae) document both rapid and slow genital evolution. *Acta Zool.*  
801 2005;
- 802 65. González AP, Huber BA. *Metagonia debrasi* n. sp. the first species of the genus  
803 *Metagonia* Simon in Cuba (Pholcidae, Araneae). *Rev Arachnol.* 1999;
- 804 66. Gertsch WJ, Ennik F. The spider genus *Loxosceles* in North America, Central America,  
805 and the West Indies (Araneae, Loxoscelidae). *Bull Am Museum Nat Hist.*  
806 1983;175:264–360.
- 807 67. Lotz LN. An update on the spider genus *Loxosceles* (Araneae: Sicariidae) in the  
808 Afrotropical region, with description of seven new species. *Zootaxa.* 2017;4341(4):475–  
809 94.
- 810 68. Wang C, Li S. Three new species of *Telemidae* (Araneae) from Western Africa.  
811 *Zootaxa.* 2011;
- 812 69. Dupérré N, Tapia E. Discovery of the first telemid spider (Araneae, Telemidae) from  
813 South America, and the first member of the family bearing a stridulatory organ. *Zootaxa.*

- 814 2015;
- 815 70. Wang C, Li S. Four new species of the spider genus *Telema* (Araneae, Telemidae) from  
816 Southeast Asia. *Zootaxa*. 2010;
- 817 71. Wang C, Li S. New species of the spider genus *Telema* (Araneae, Telemidae) from caves  
818 in Guangxi, China. *Zootaxa*. 2010;
- 819 72. Lin Y, Li S. Long-legged cave spiders (Araneae, Telemidae) from Yunnan-Guizhou  
820 Plateau, southwestern China. *Zootaxa*. 2010;
- 821 73. Platnick NI. A revision of the ground spider family Cithaeronidae (Araneae,  
822 Gnaphosoidea). *Am Museum Novit*. 1991;3018:1–13.
- 823 74. Platnick NI, Shadab M, Sorkin L. On the Chilean Spiders of the Family Prodidomidae  
824 (Araneae, Gnaphosoidea), with a Revision of the Genus *Moreno Mello-Leitão*. *Am*  
825 *Museum Novit*. 2005;1–31.
- 826 75. Gajbe UA. Araneae: Arachnida. In: Fauna of Madhya Pradesh (including Chhattisgarh),  
827 State Fauna Series. *Zool Surv India, Kolkata*. 2007;15(1):419–540.
- 828 76. Holwell GI, Herberstein ME. Chirally dimorphic male genitalia in praying mantids  
829 (*Ciulfina*: Liturgusidae). *J Morphol*. 2010;
- 830 77. Gertsch WJ. The spider genus *Loxosceles* in South America (Araneae, Scytodidae). *Bull*  
831 *Am Museum Nat Hist*. 1967;136:117–74.
- 832 78. Wang C, Li S. Four new species of the subfamily Psilodercinae (Araneae:  
833 Ochyroceratidae) from Southwest China. *Zootaxa*. 2013;
- 834 79. Swaddle JP, Witter MS, Cuthill IC. The analysis of fluctuating asymmetry. *Animal*  
835 *Behaviour*. 1994. p. 986–9.
- 836 80. Palmer AR, Strobeck C. Fluctuating asymmetry and developmental stability: heritability  
837 of observable variation vs. heritability of inferred cause. *J Evol Biol*. 1997;
- 838 81. Schilthuizen M, Davison A. The convoluted evolution of snail chirality.  
839 *Naturwissenschaften*. 2005.
- 840 82. Holwell GI, Kazakova O, Evans F, O’Hanlon JC, Barry KL. The functional significance  
841 of chiral genitalia: Patterns of asymmetry, functional morphology and mating success in  
842 the praying mantis *Ciulfina baldersoni*. *PLoS One*. 2015;10(6).
- 843 83. Palmer AR. Symmetry breaking and the evolution of development. *Science*. 2004.
- 844 84. Bristowe WS. The world of spiders. The world of spiders. London: Collins; 1958. 304 p.
- 845 85. Brady AR. The lynx spiders of North America, north of Mexico (Araneae: Oxyopidae).  
846 *Bull Museum Comp Zool*. 1964;131:429–518.
- 847 86. Agnarsson I, Avilés L, Coddington JA, Maddison WP. Sociality in theridiid spiders:  
848 repeated origins of an evolutionary dead end. *Evolution (N Y)*. 2006;
- 849

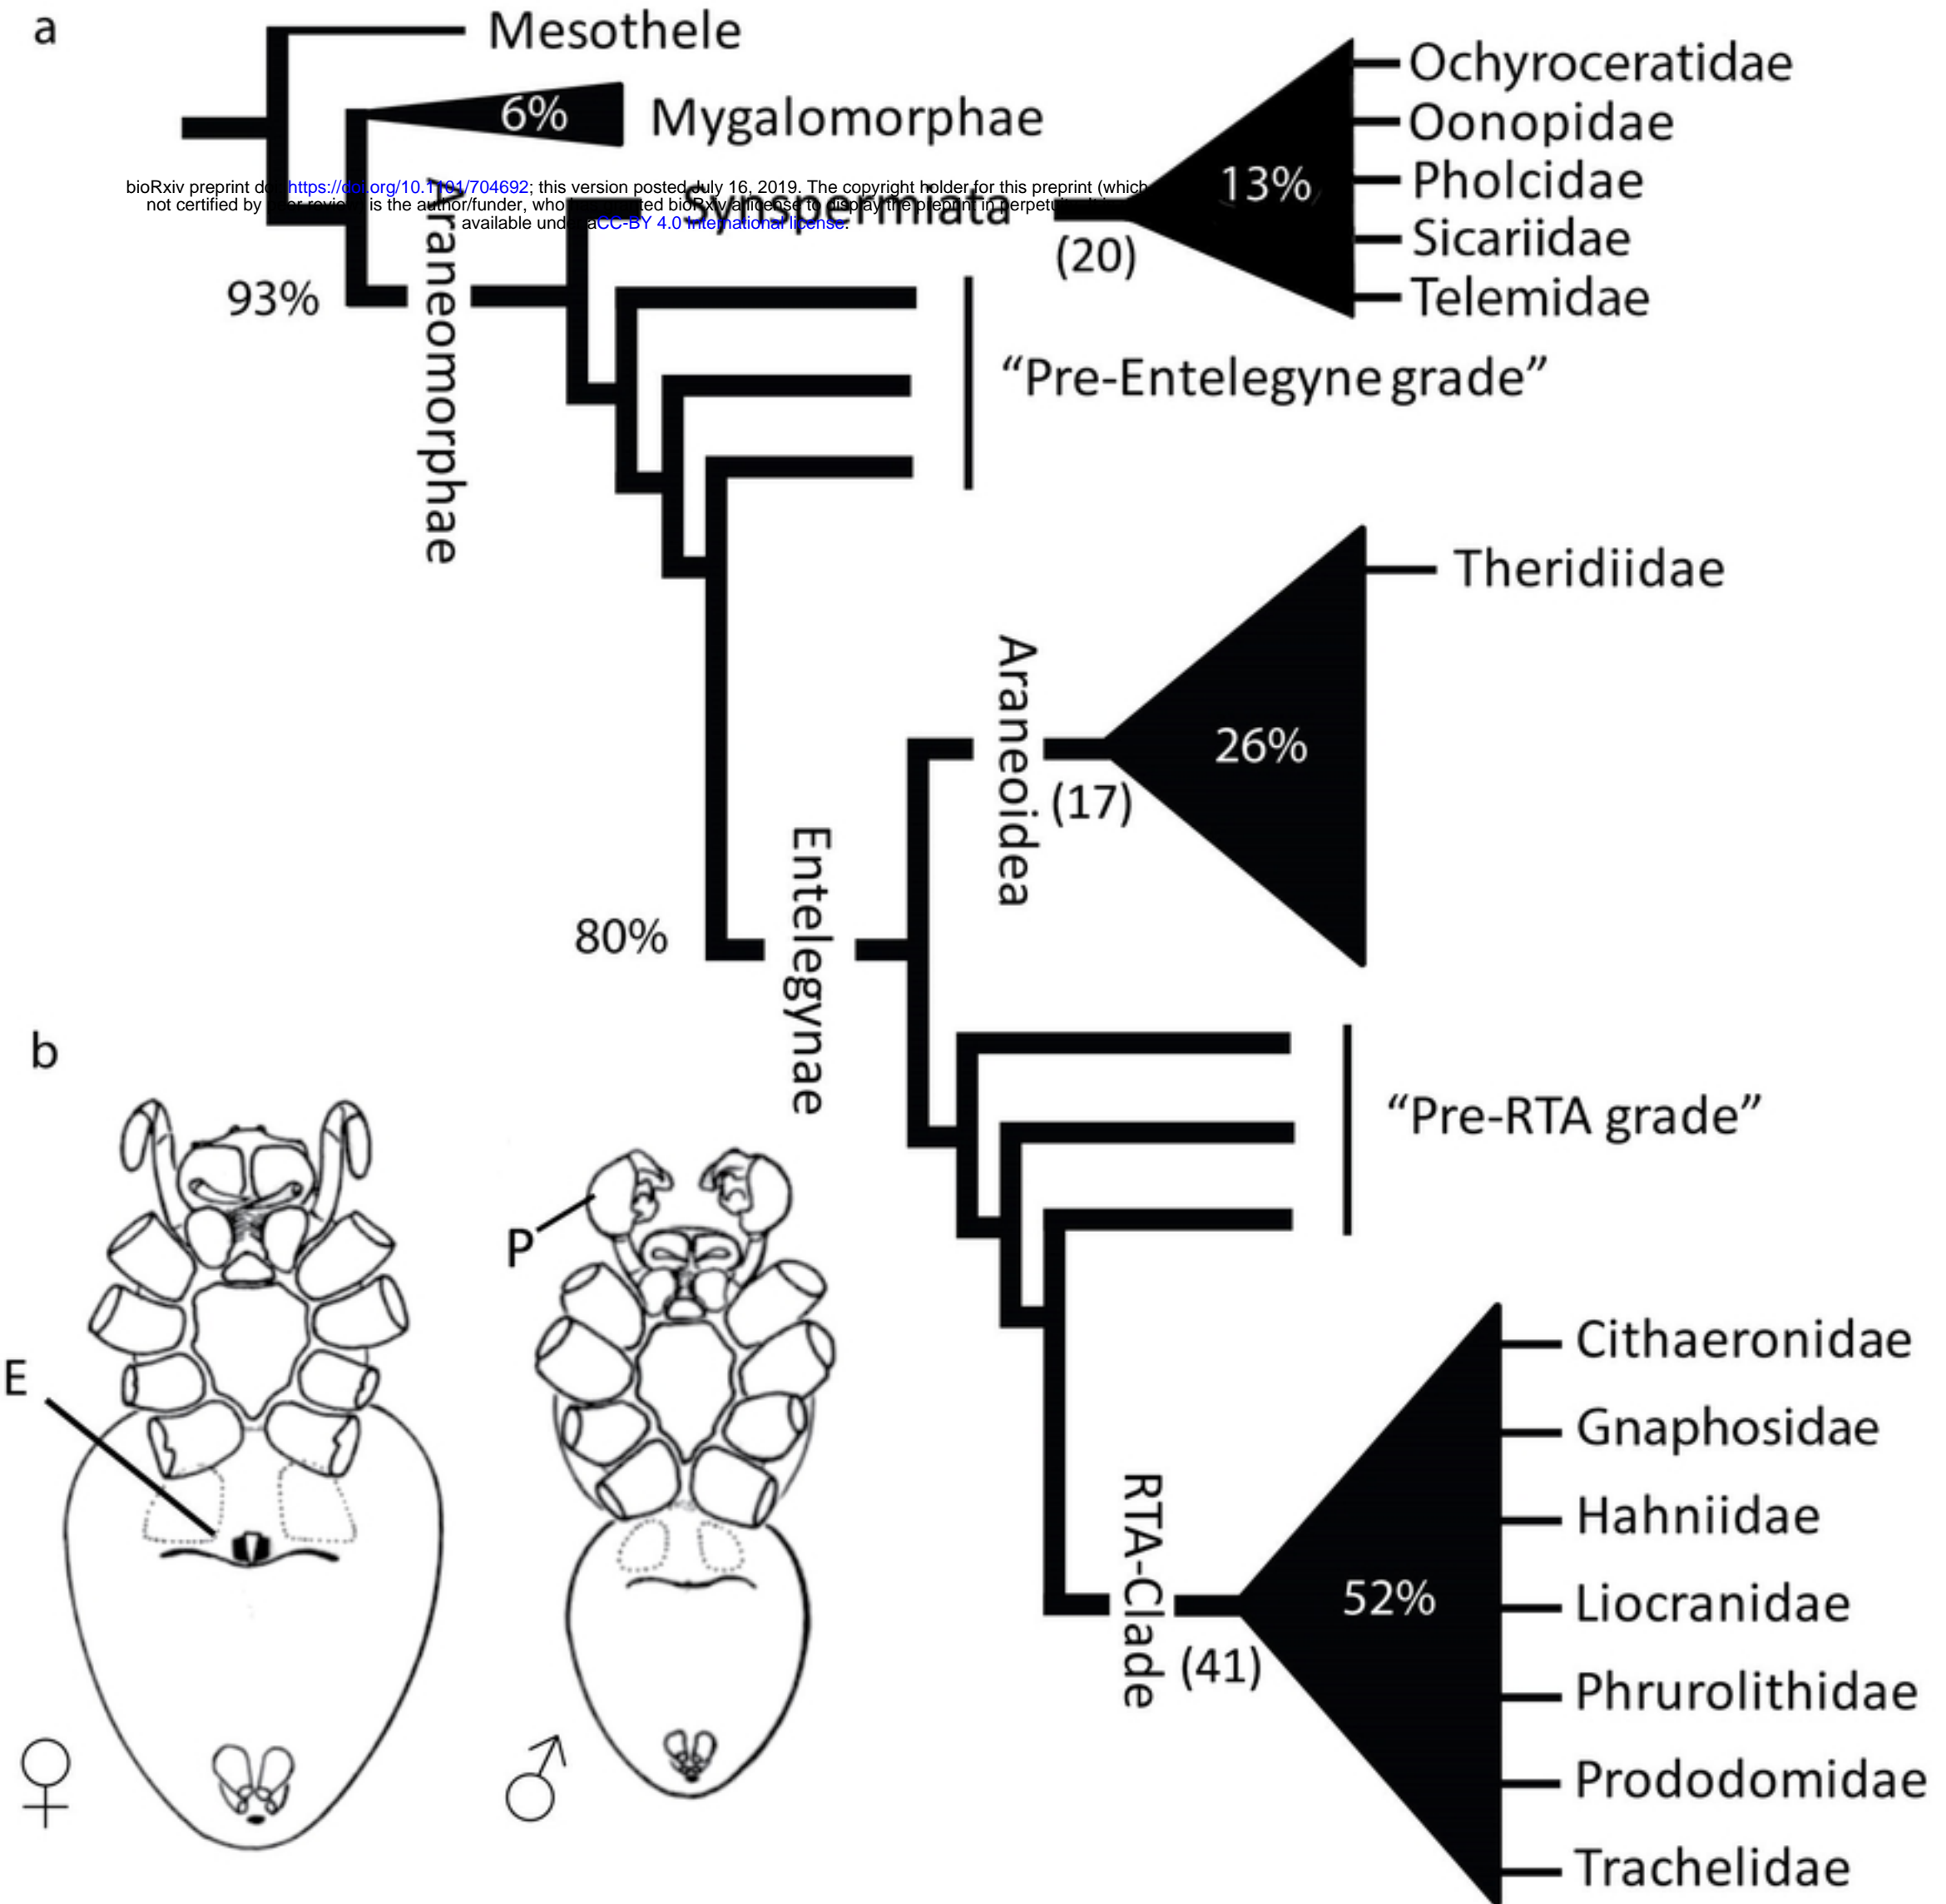



bioRxiv preprint doi: <https://doi.org/10.1101/704692>; this version posted July 16, 2019. The copyright holder for this preprint (which was not certified by peer review) is the author/funder, who has granted bioRxiv a license to display the preprint in perpetuity. It is made available under aCC-BY 4.0 International license.

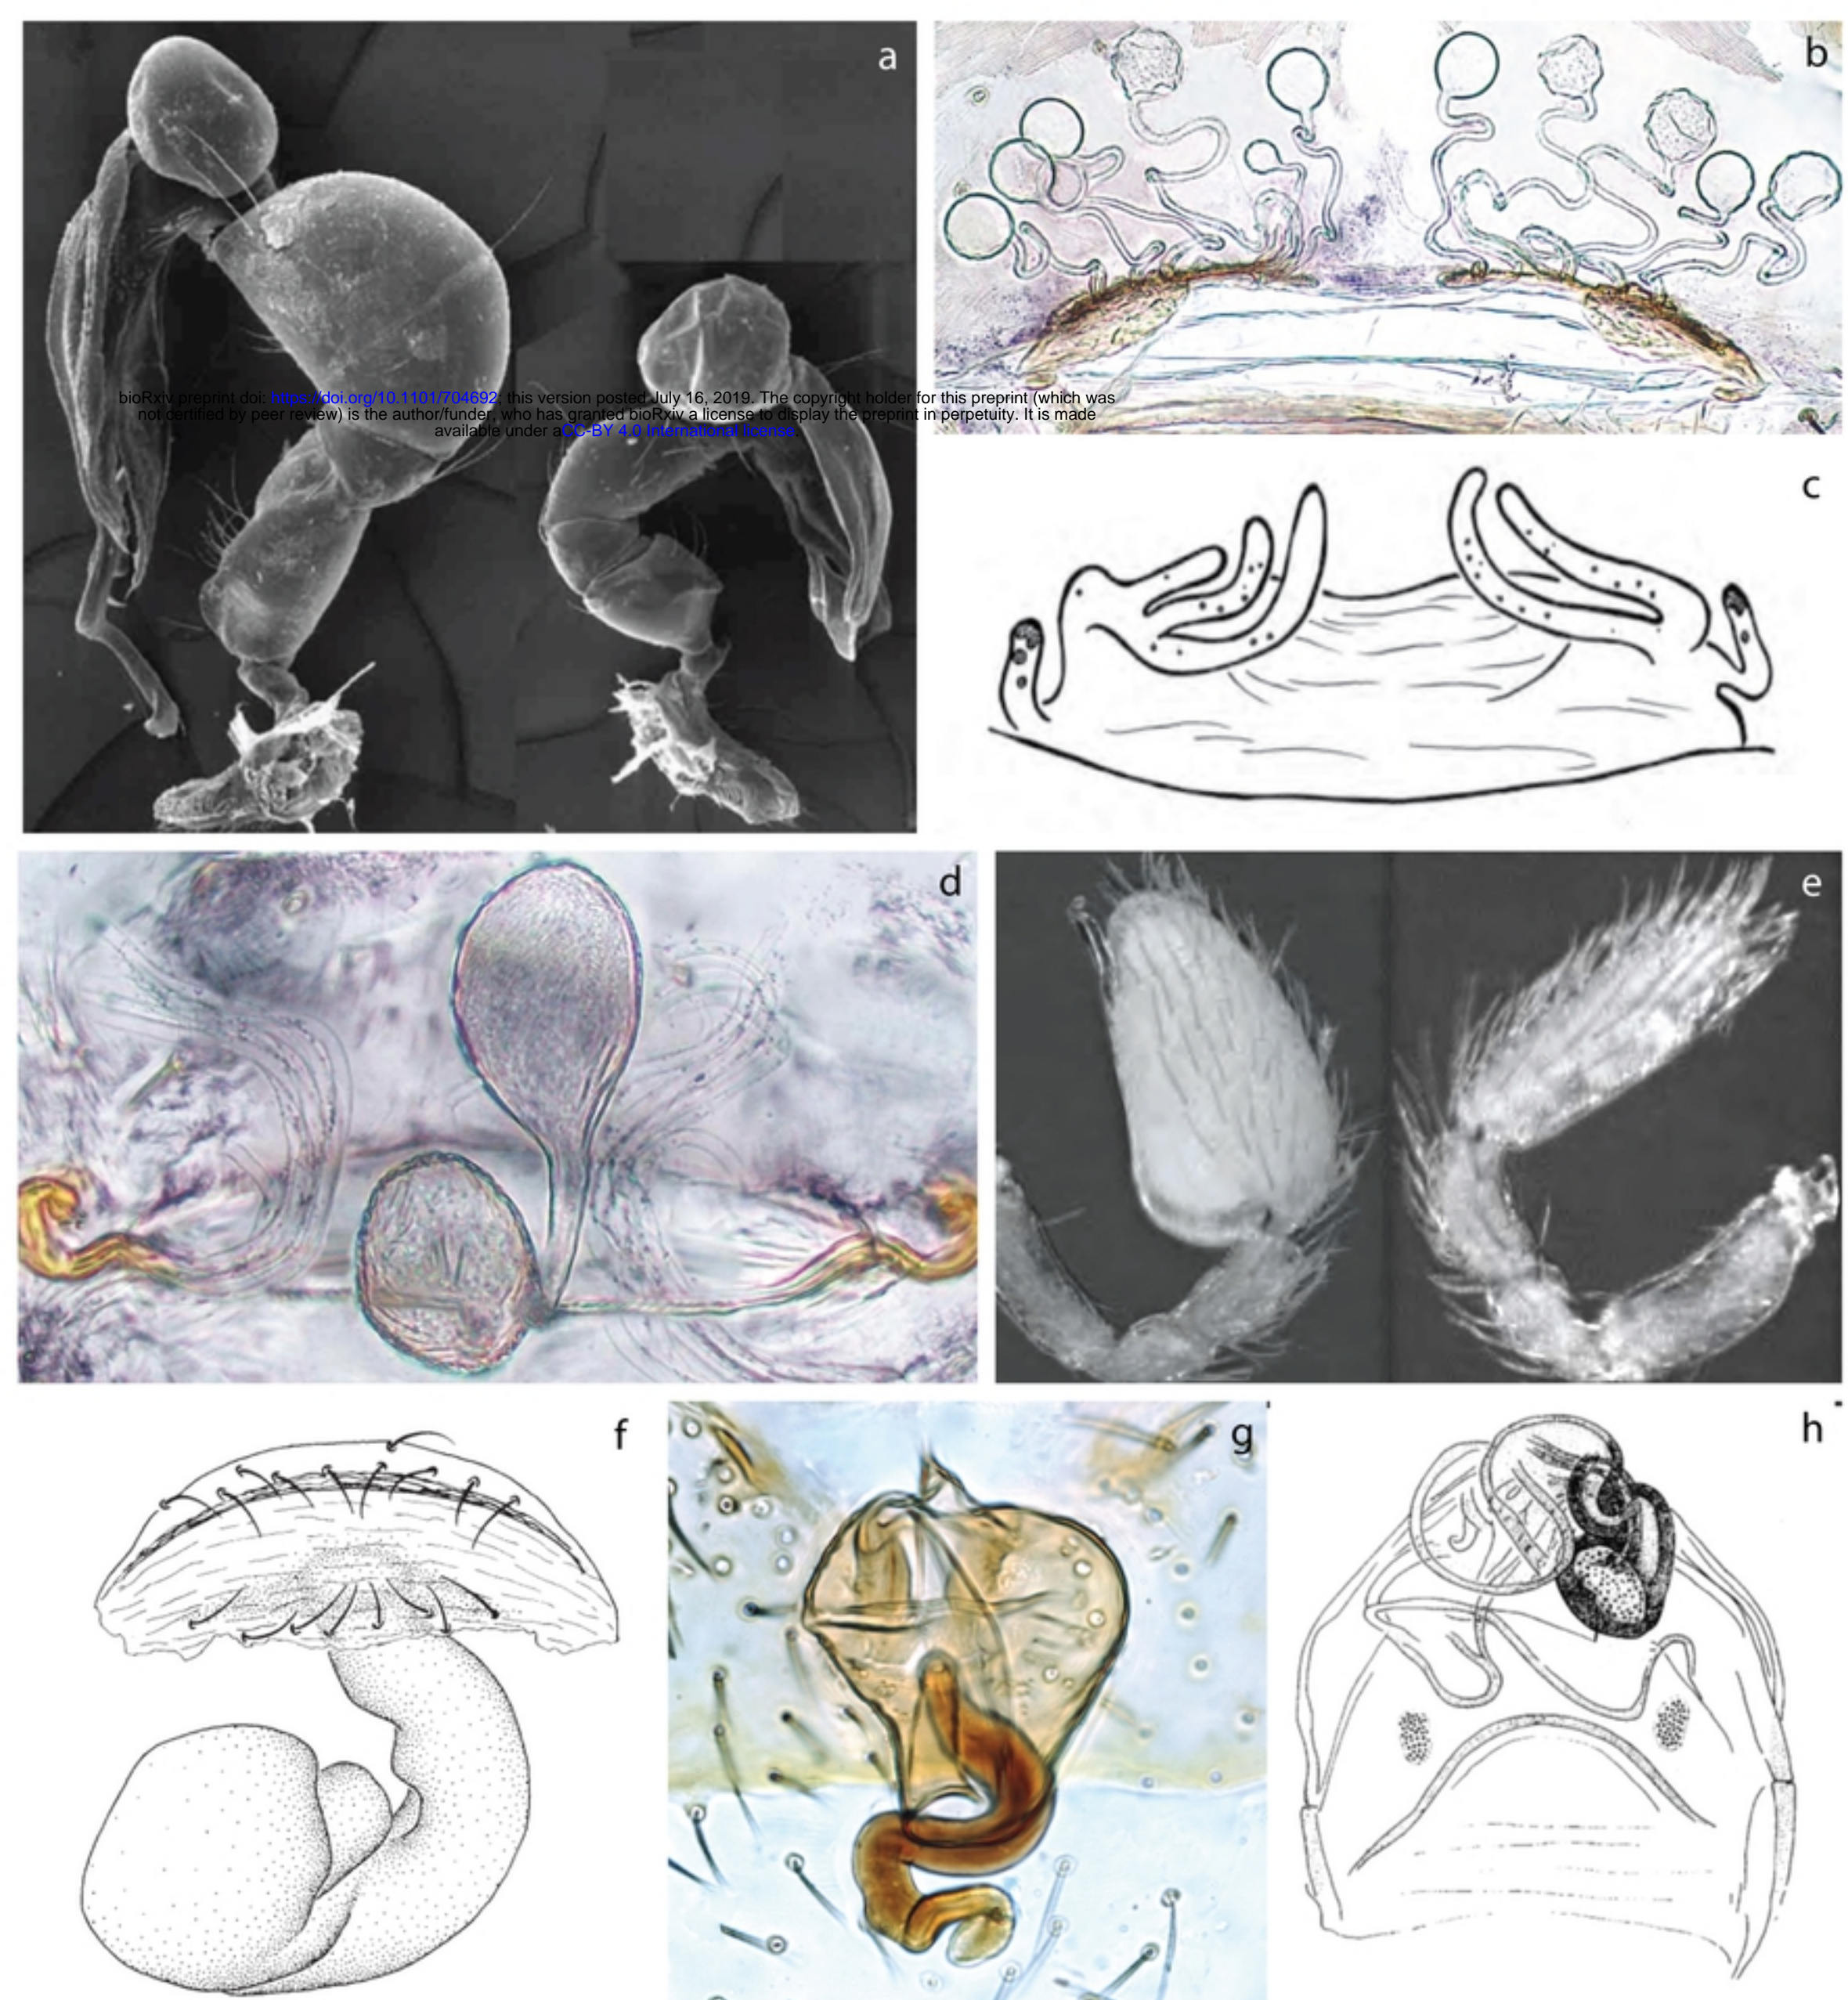

Figure 2

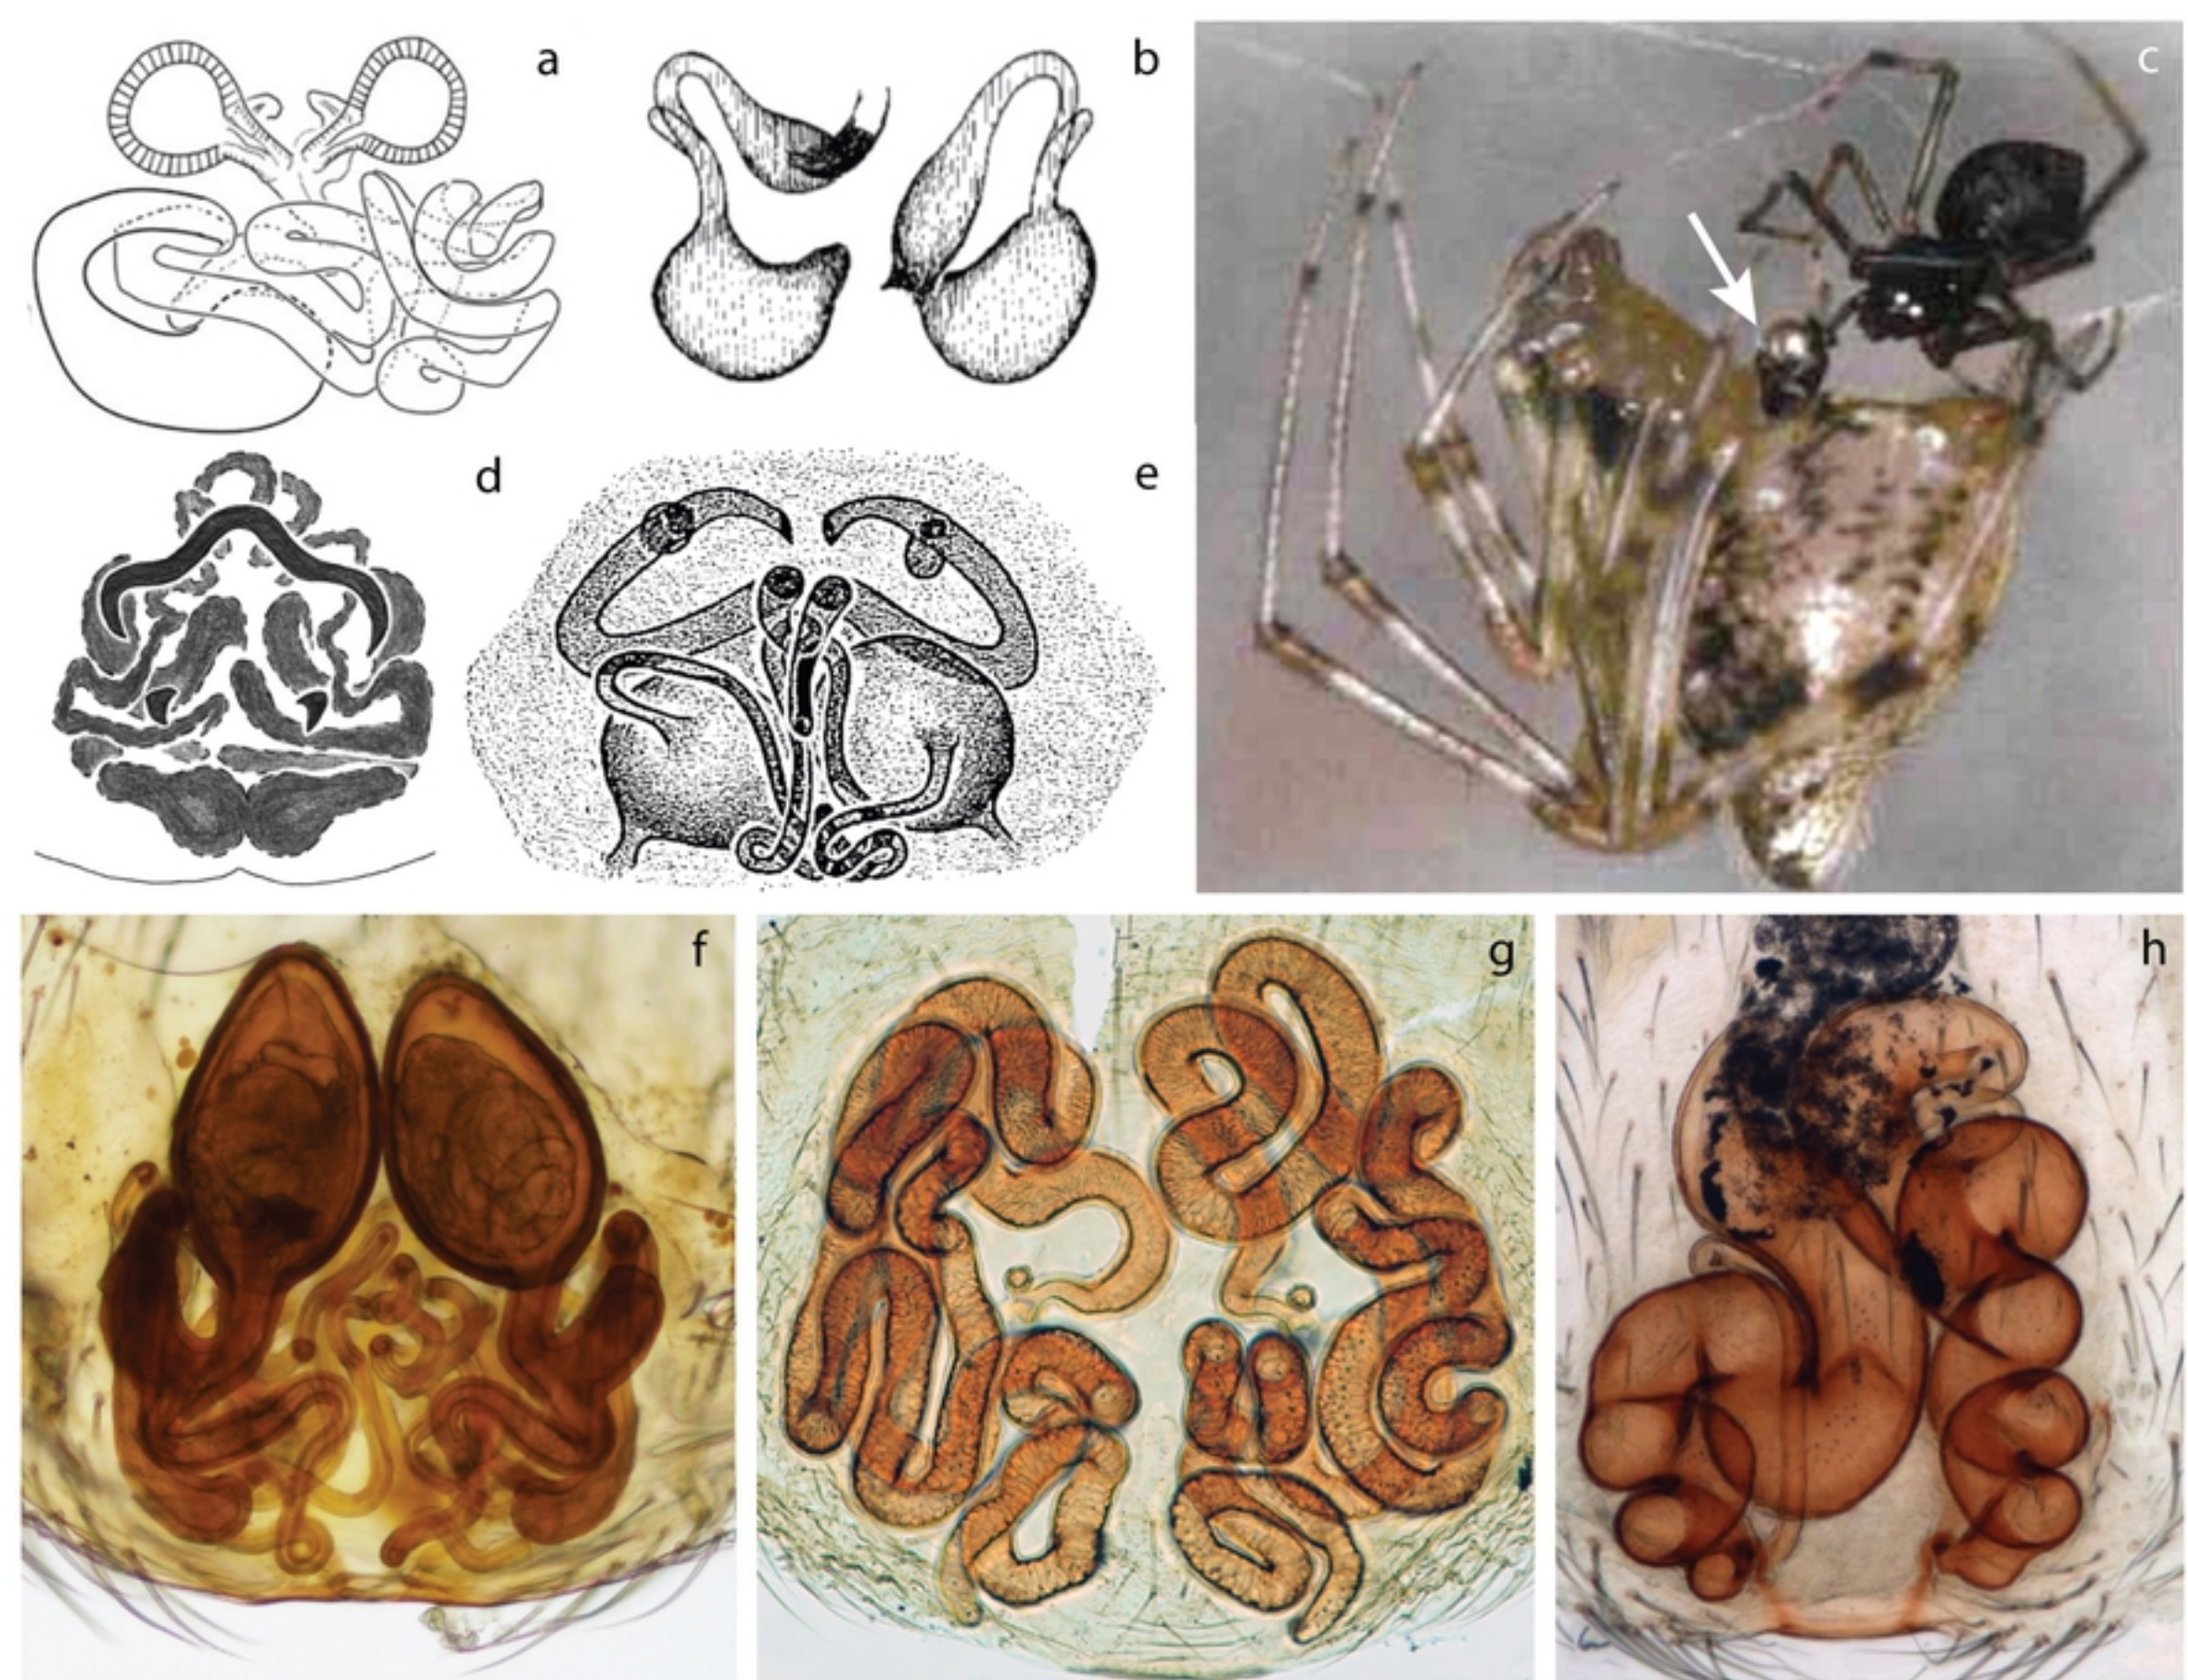

Figure 3

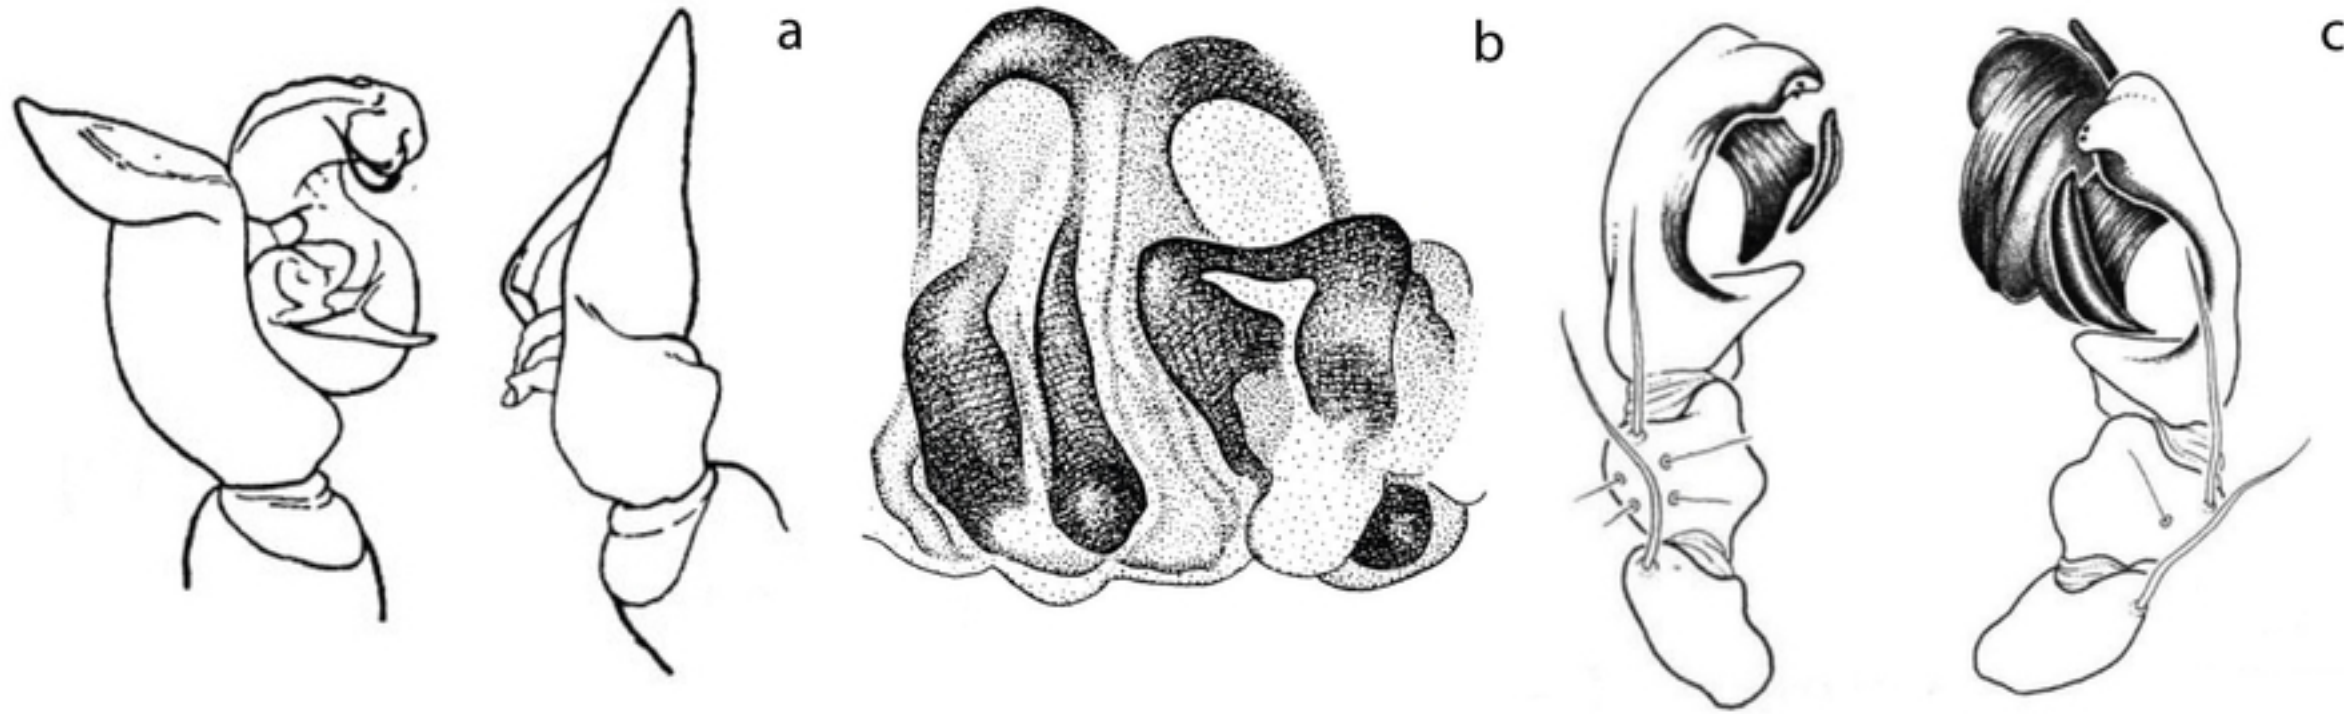

Figure 4

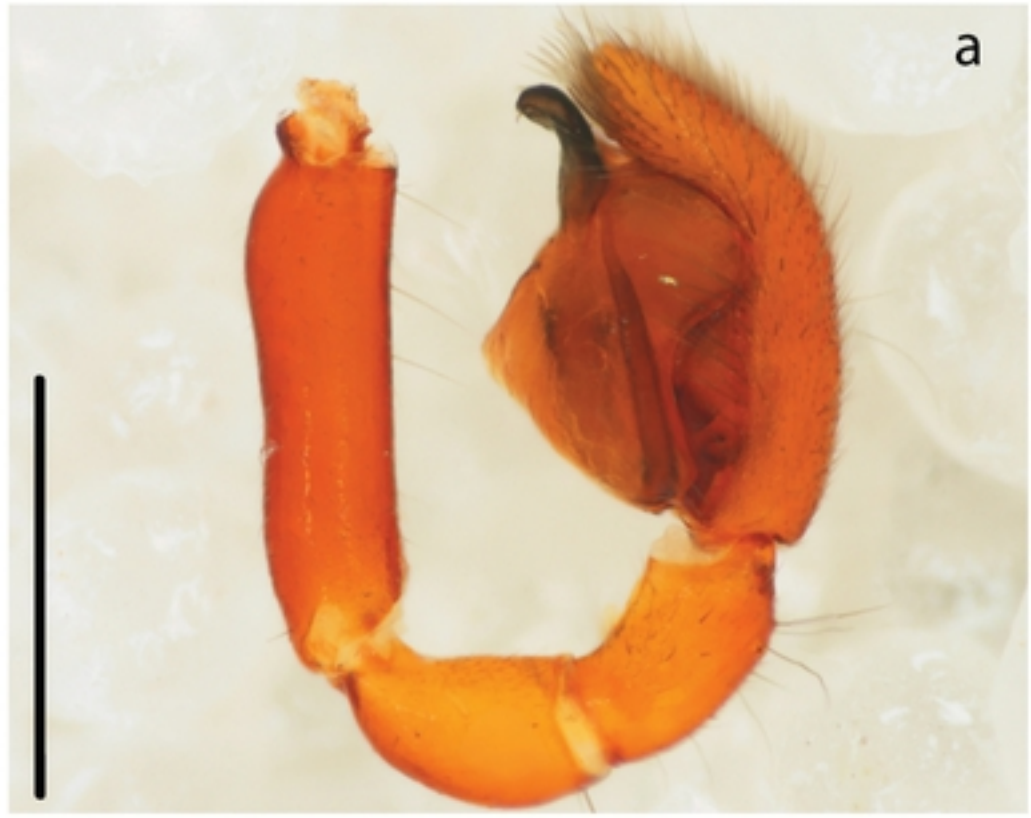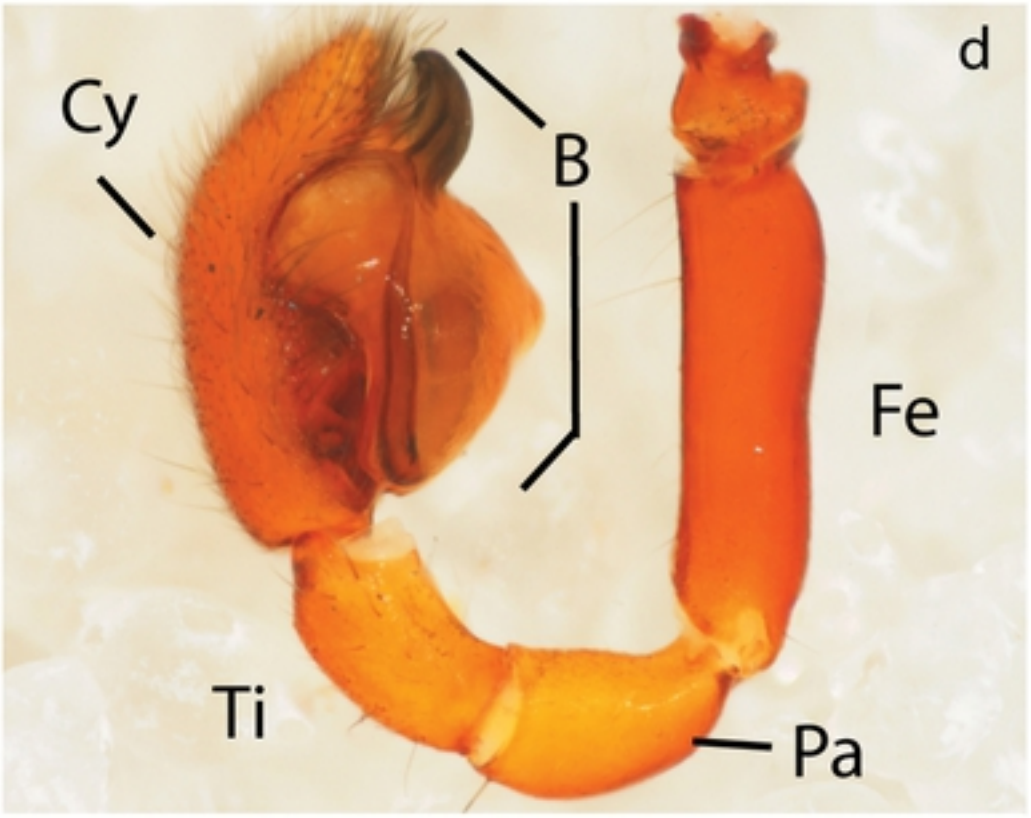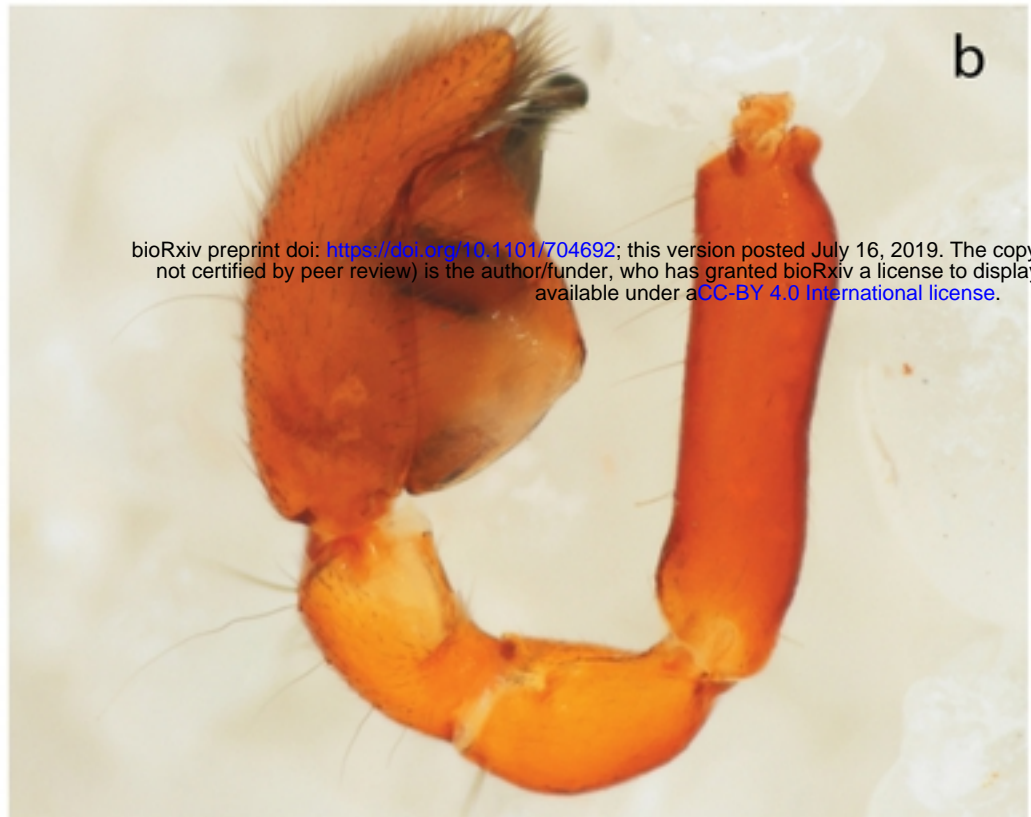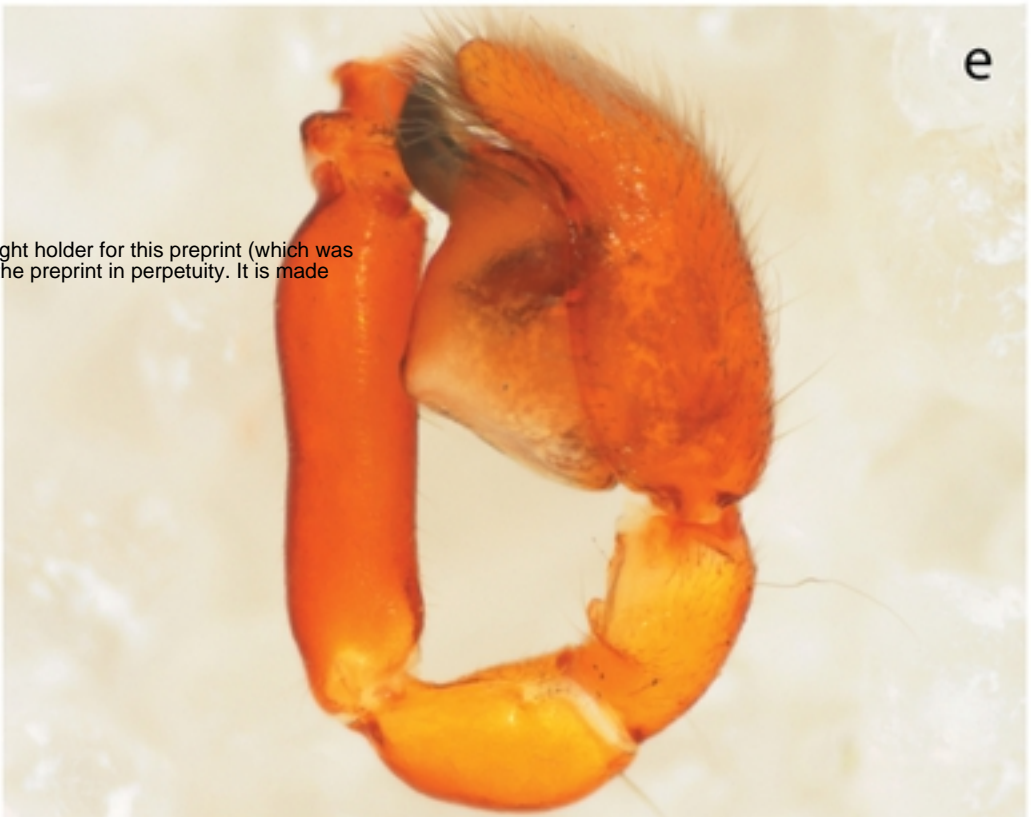

bioRxiv preprint doi: <https://doi.org/10.1101/704692>; this version posted July 16, 2019. The copyright holder for this preprint (which was not certified by peer review) is the author/funder, who has granted bioRxiv a license to display the preprint in perpetuity. It is made available under aCC-BY 4.0 International license.

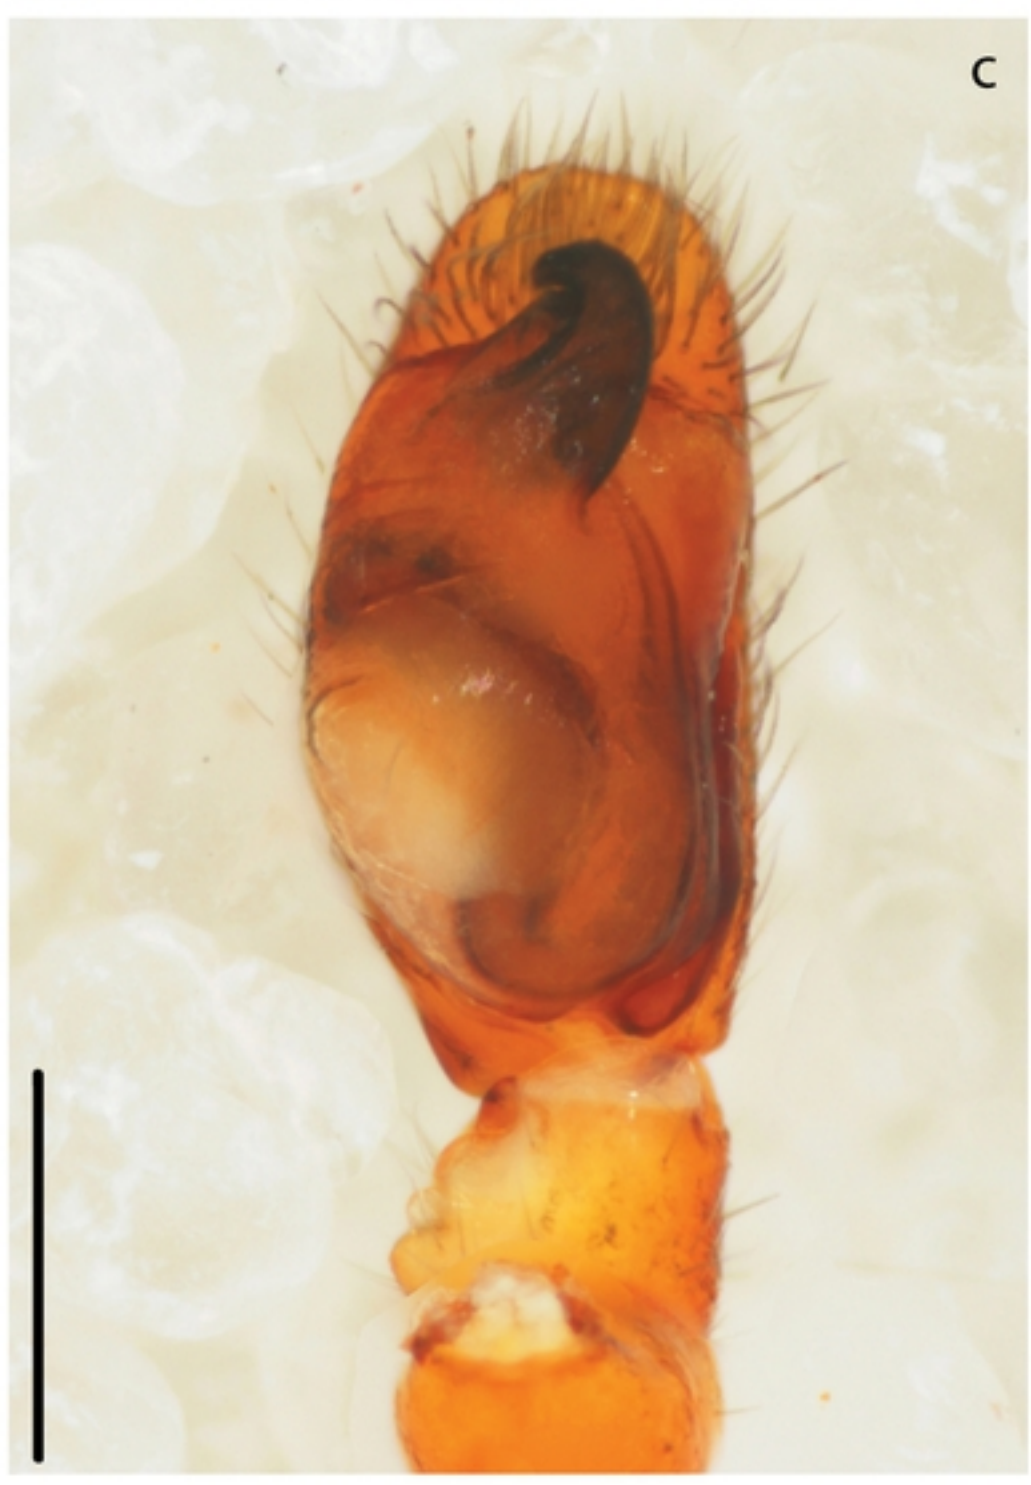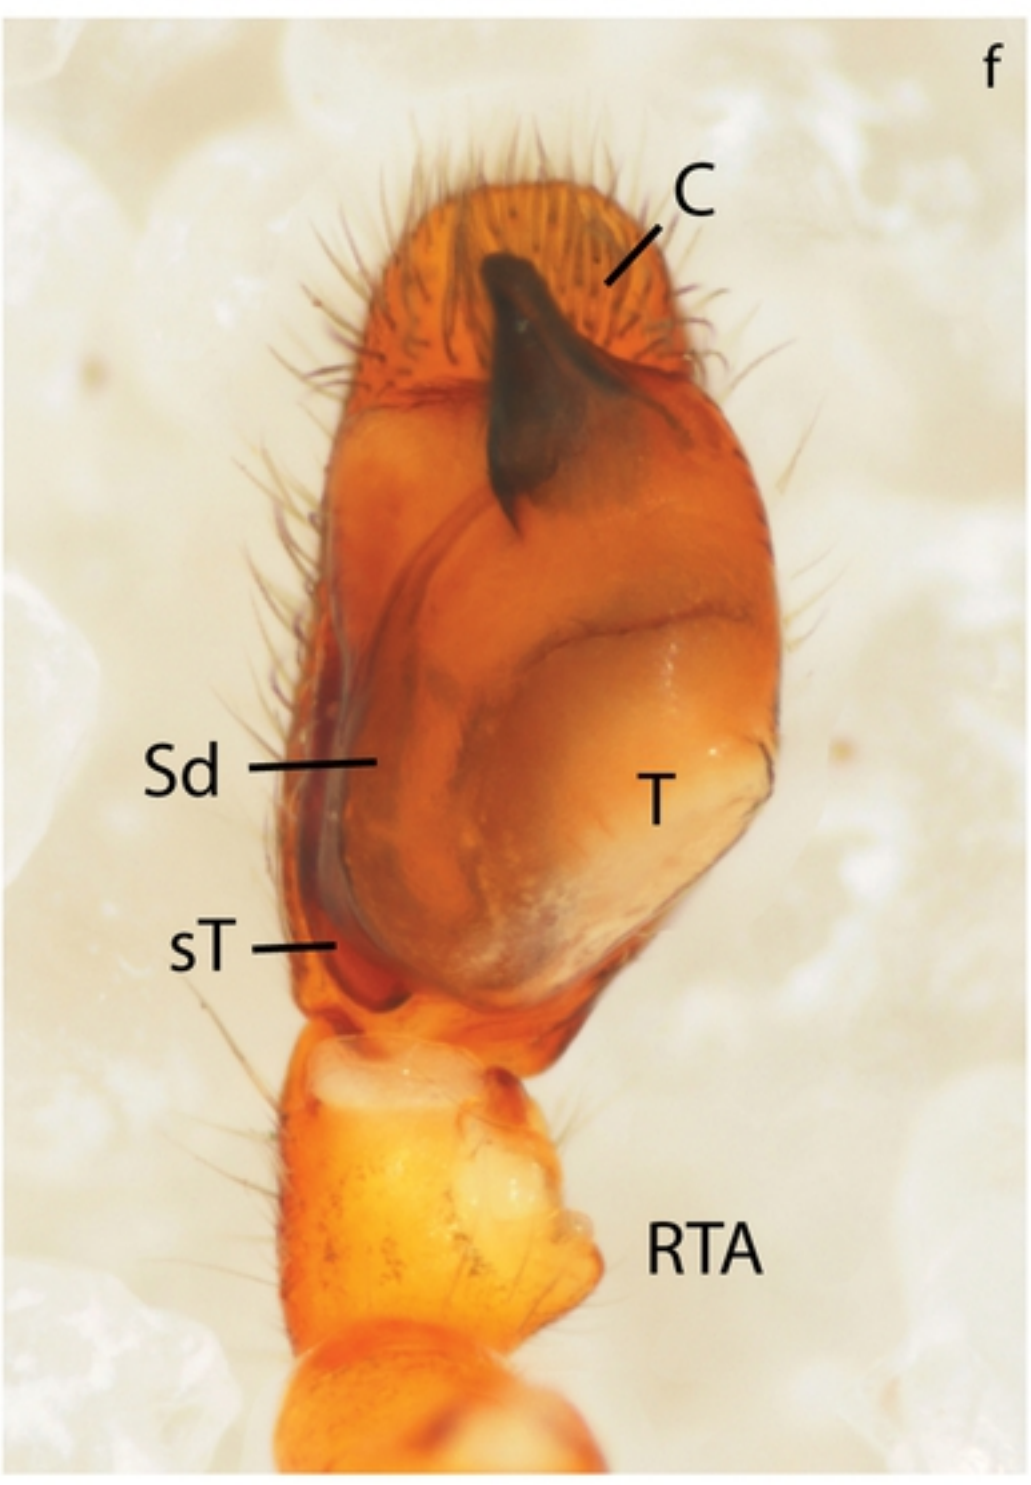

Figure 5

bioRxiv preprint doi: <https://doi.org/10.1101/704692>; this version posted July 16, 2019. The copyright holder for this preprint (which was not certified by peer review) is the author/funder, who has granted bioRxiv a license to display the preprint in perpetuity. It is made available under aCC-BY 4.0 International license.

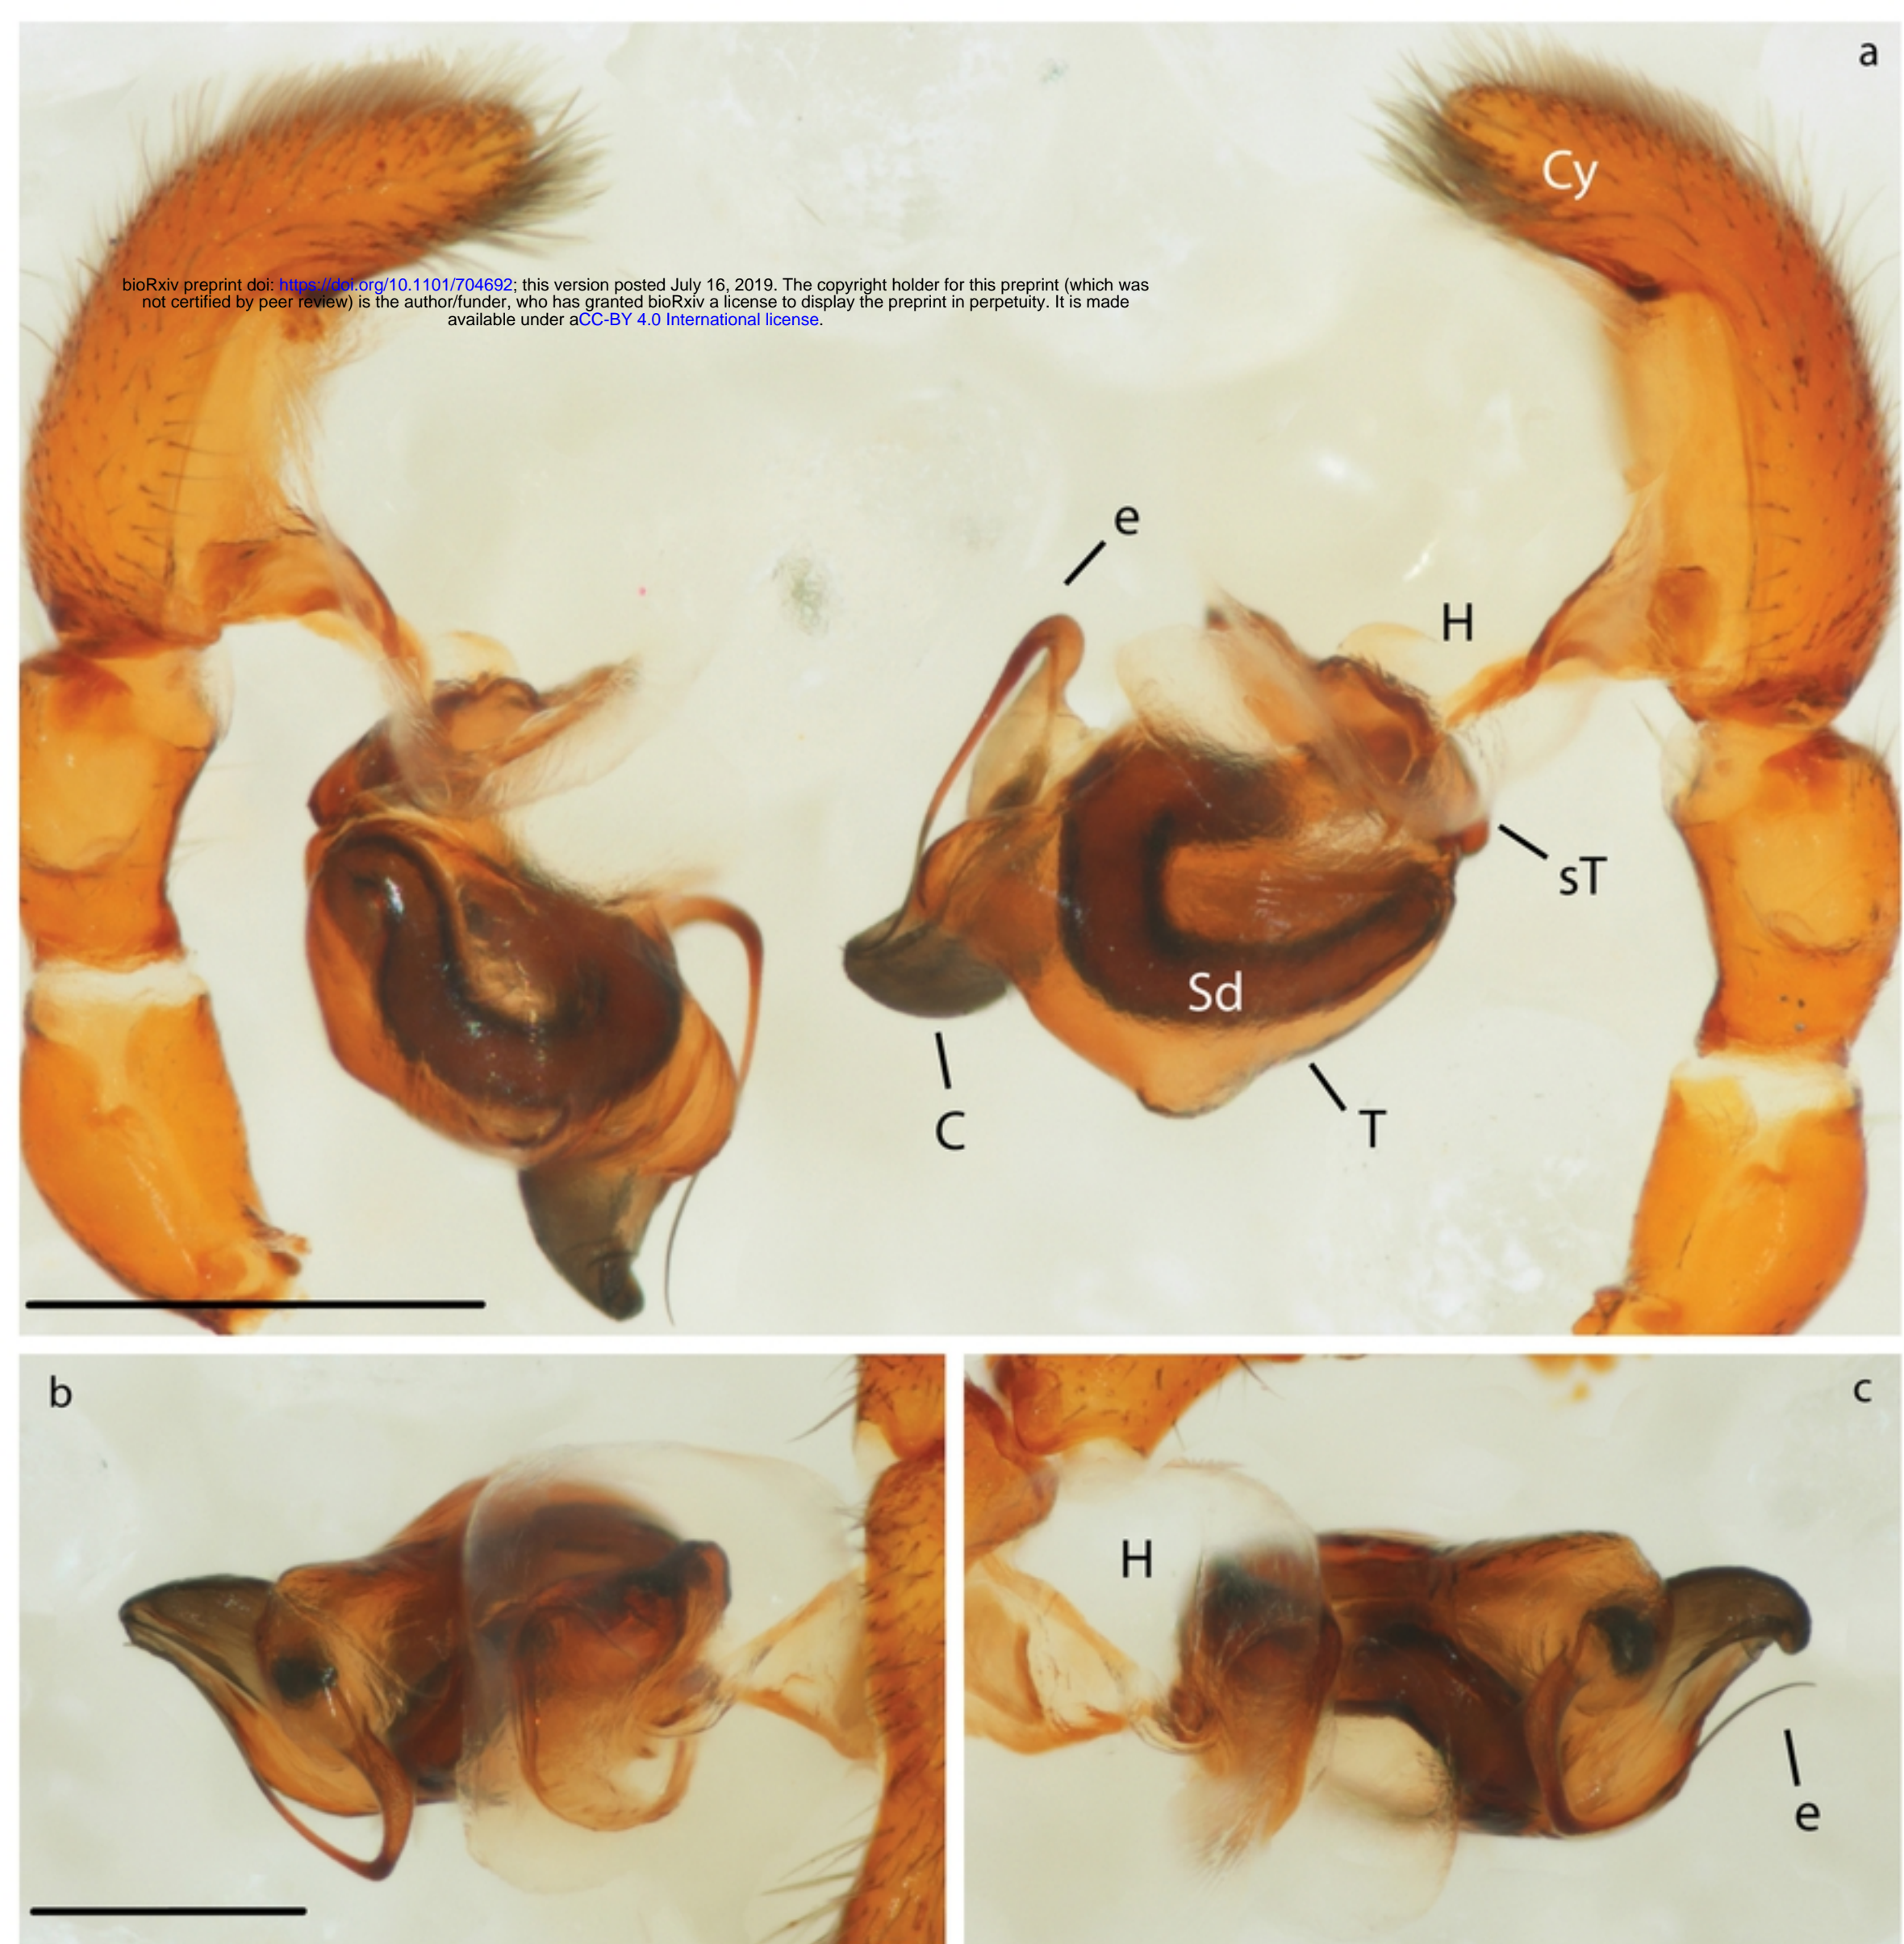

Figure 6

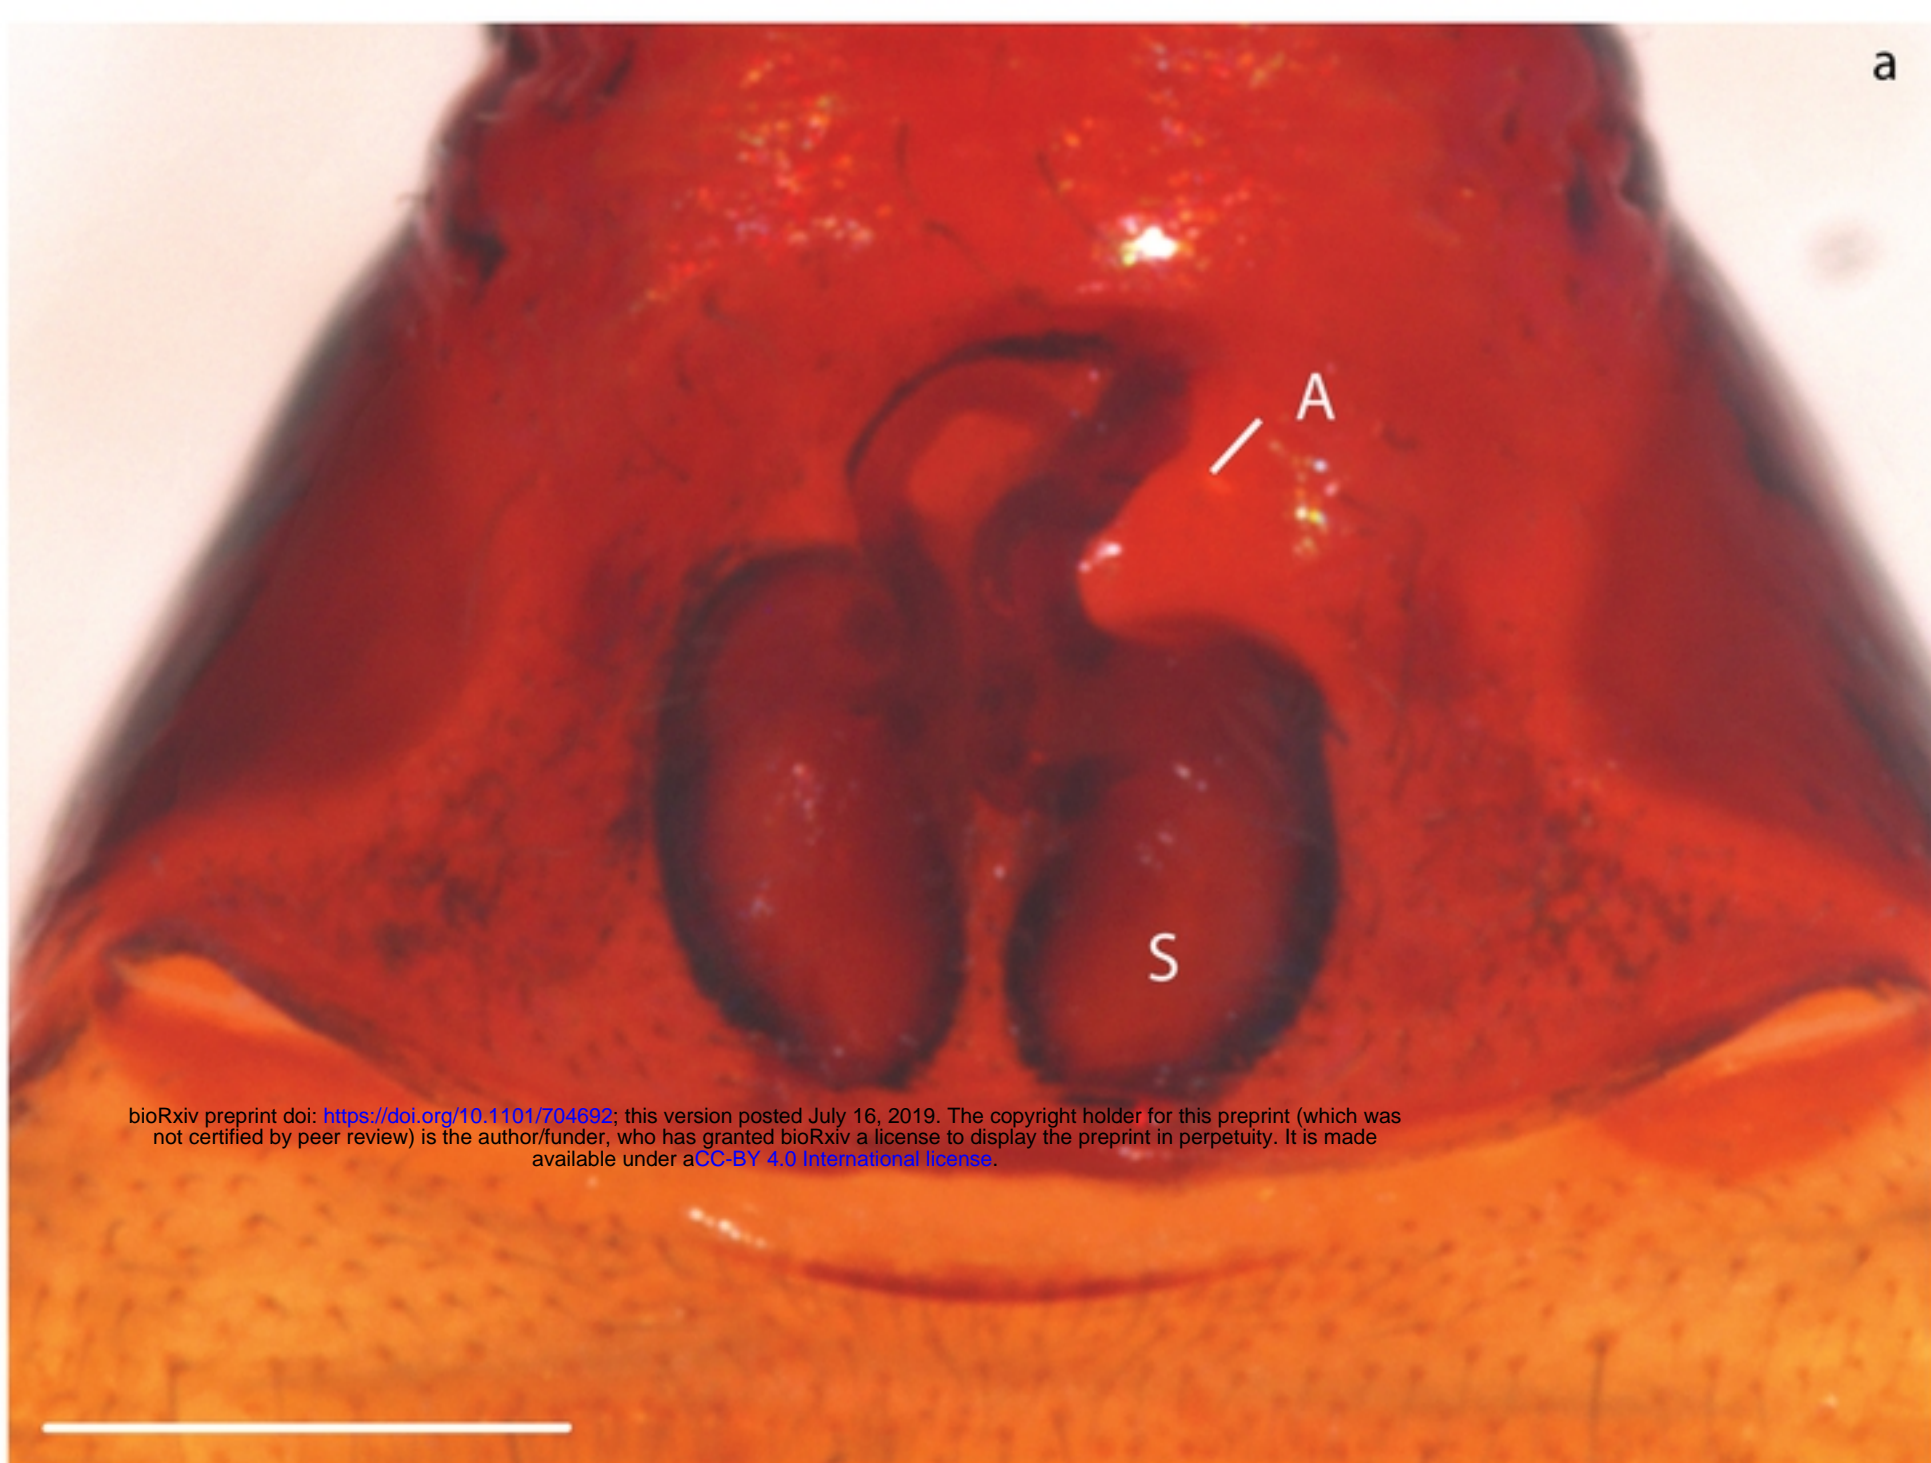

bioRxiv preprint doi: <https://doi.org/10.1101/704692>; this version posted July 16, 2019. The copyright holder for this preprint (which was not certified by peer review) is the author/funder, who has granted bioRxiv a license to display the preprint in perpetuity. It is made available under aCC-BY 4.0 International license.

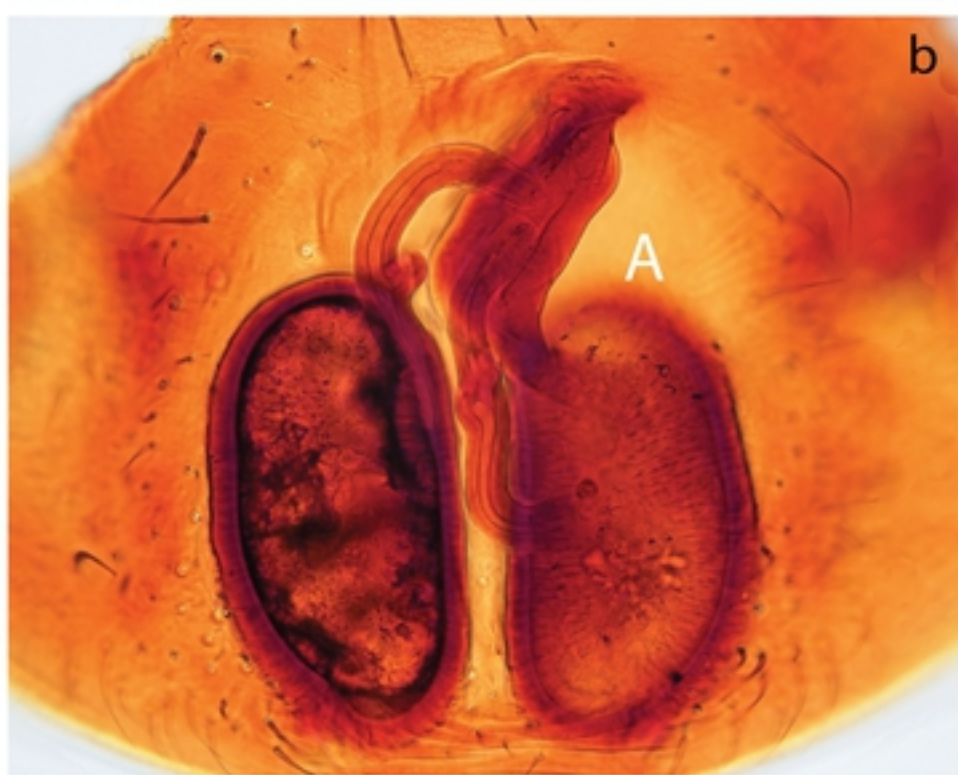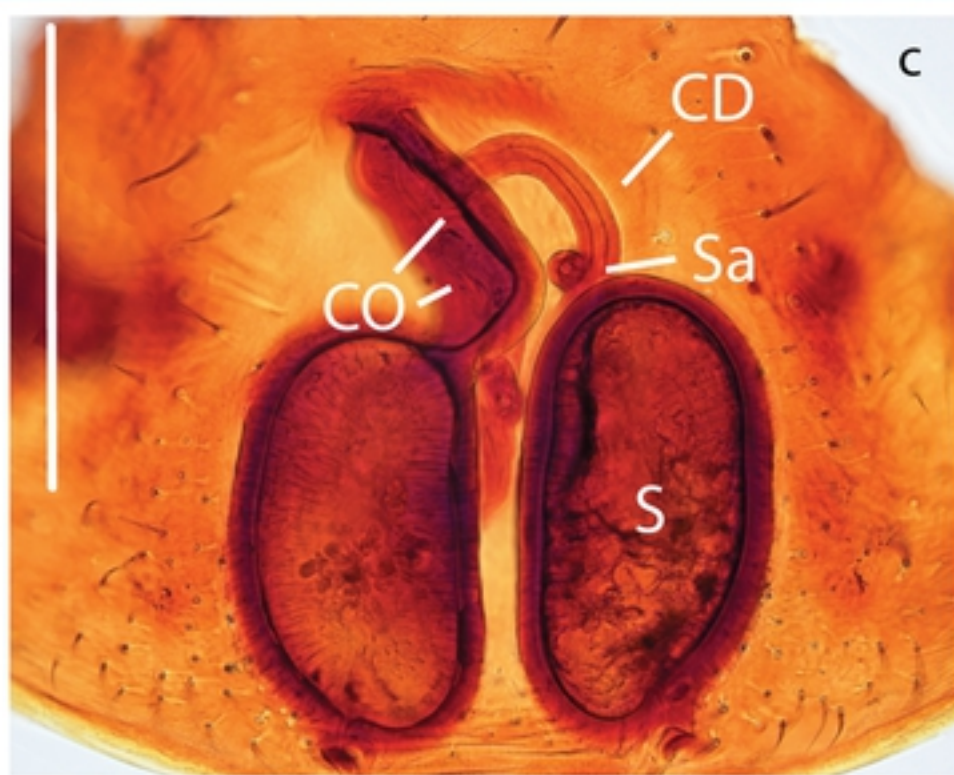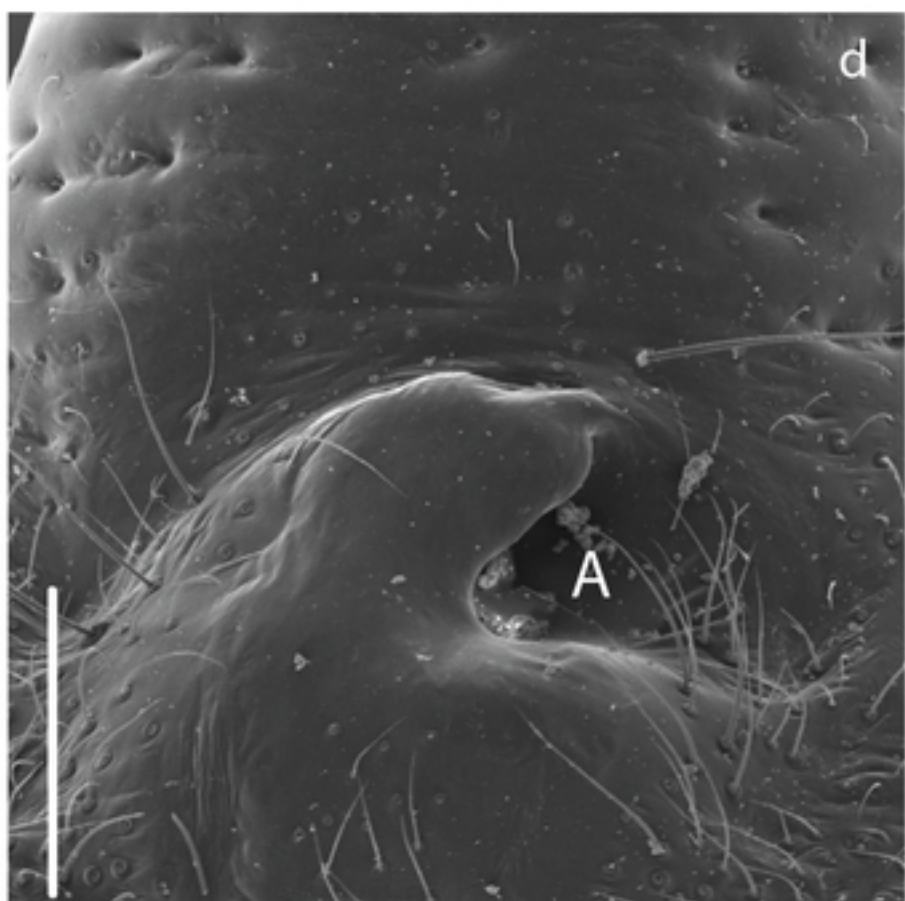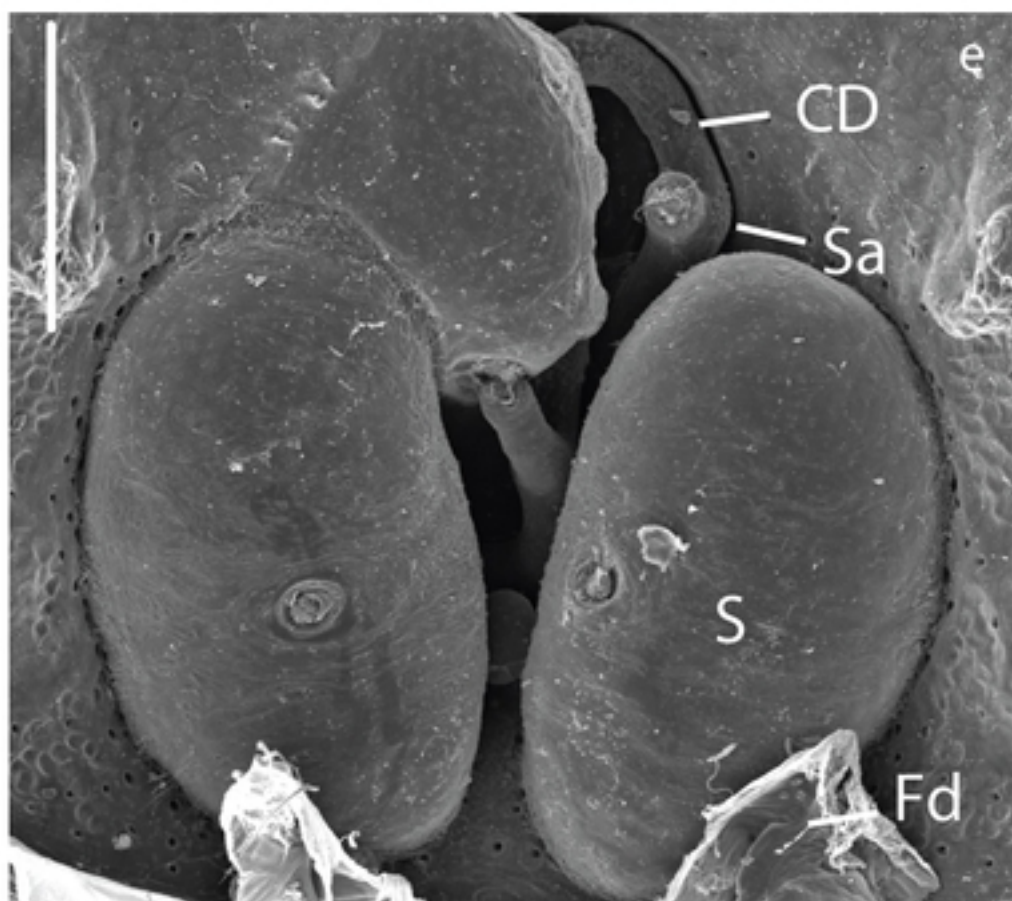

Figure 7

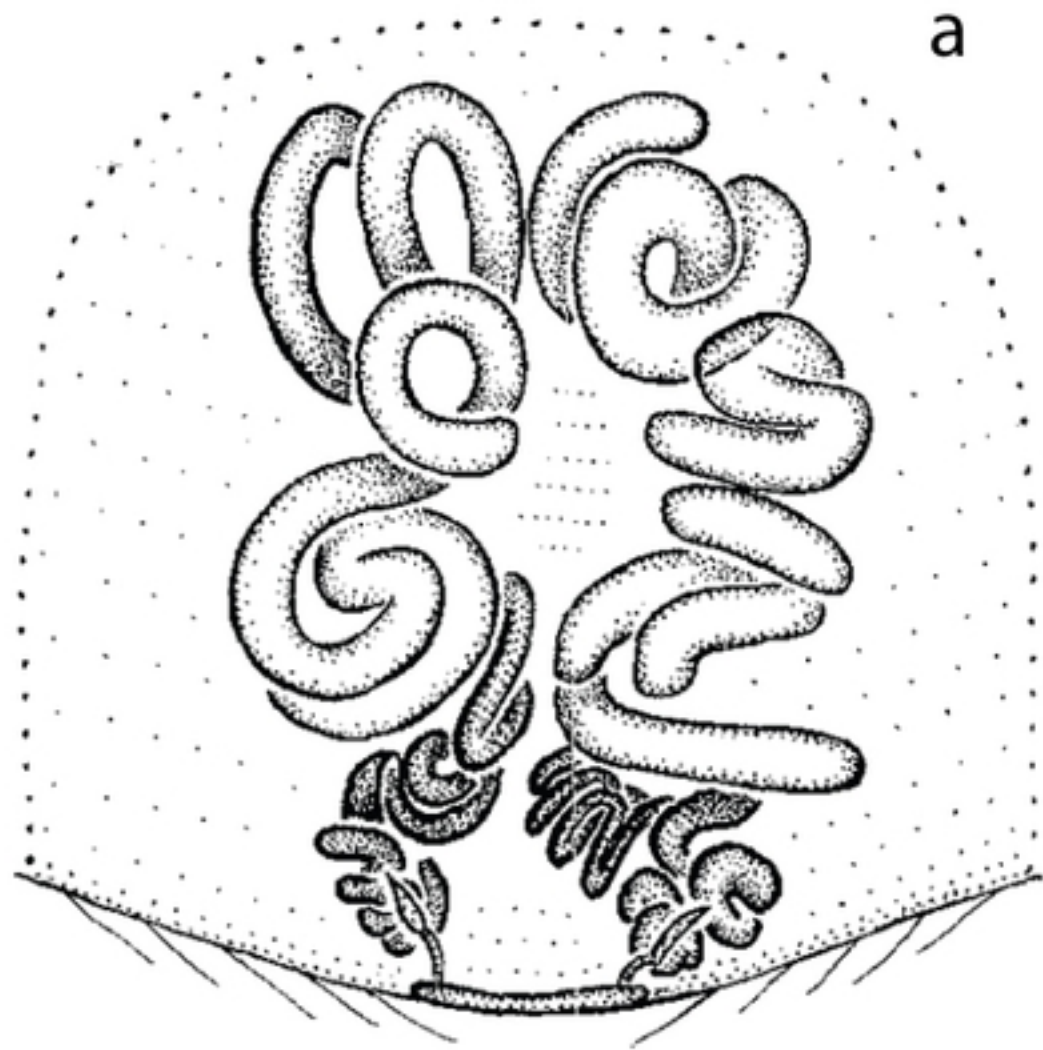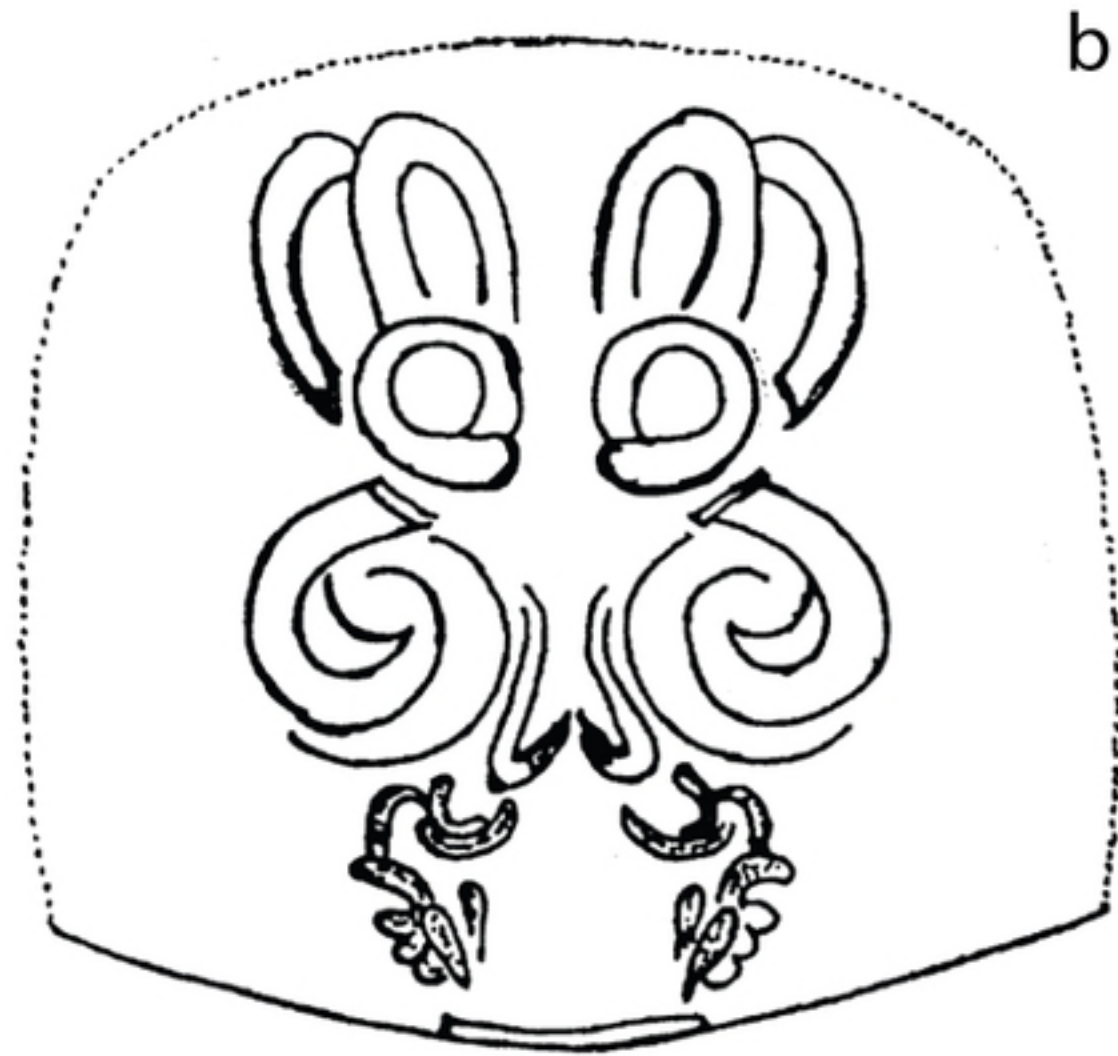

Figure 8
